1 **A gene-based clustering approach reveals QSOX1/IL1RAP as promising**

2 **biomarkers for the severity of non-alcoholic fatty liver disease**

3

4 Wenfeng Ma <sup>1,2,3,4</sup>, Jinrong Huang <sup>2</sup>, Benqiang Cai <sup>1,4</sup>, Mumin Shao <sup>6,7</sup>, Xuewen Yu <sup>6,7</sup>,  
5 Mikkel Breinholt Kjær <sup>5,8</sup>, Minling Lv <sup>1,4</sup>, Xin Zhong <sup>1,4</sup>, Shaomin Xu <sup>1,4</sup>, Bolin Zhan <sup>1,4</sup>,  
6 Qun Li <sup>1,4</sup>, Qi Huang <sup>1,4</sup>, Mengqing Ma <sup>1,4</sup>, Lei Cheng <sup>2</sup>, Yonglun Luo <sup>2,3\*</sup>, Henning  
7 Grønbaek <sup>5\*</sup>, Xiaozhou Zhou <sup>1,4\*</sup>, Lin Lin <sup>2,3\*</sup>

8

9 1 Department of Liver Disease, Shenzhen Traditional Chinese Medicine Hospital,  
10 Shenzhen, Guangdong 518033, China.

11 2 Department of Biomedicine, Aarhus University, Aarhus, Denmark.

12 3 Steno Diabetes Center Aarhus, Aarhus University Hospital, Aarhus, Denmark.

13 4 Department of Liver Disease, The Fourth Clinical Medical College of Guangzhou  
14 University of Chinese Medicine, Shenzhen, 518033, China.

15 5 Department of Hepatology and Gastroenterology, Aarhus University Hospital,  
16 Aarhus, Denmark.

17 6 Department of Pathology, Shenzhen Traditional Chinese Medicine Hospital,  
18 Shenzhen, Guangdong 518033, China.

19 7 Department of Pathology, The Fourth Clinical Medical College of Guangzhou  
20 University of Chinese Medicine, Shenzhen, 518033, China.

21 8 Department of Clinical Medicine, Aarhus University, Aarhus, Denmark.

22 \* = corresponding author

23

24

25

26

27 **Highlights**

28

29 RNA-seq data from 625 liver specimens comprising healthy controls and NAFLD  
30 patients with increasing severity were utilized for screening NAFLD biomarkers.

31 •

32 An unsupervised method for clustering genes based on the similarity of gene  
33 expression trajectory across all samples enhanced the discovery of novel effective  
34 non-invasive NAFLD biomarkers.

35 •

36 QSOX1, IL1RAP, and especially the QSOX1/IL1RAP ratio, were found to be associated  
37 with NAFLD severity.

38 •

39 The high sensitivity of the QSOX1/IL1RAP ratio in predicting NAFLD severity was  
40 validated with plasma proteomics quantification (AUROC = 0.95) and ELISA (AUROC =  
41 0.82) in two independent patient cohorts.

42

43

44 **Abstract**

45 **Background and Aims:** Non-alcoholic fatty liver disease (NAFLD) is a progressive liver  
46 disease that ranges from simple steatosis to inflammation, fibrosis, and cirrhosis. To  
47 address the unmet need for new NAFLD biomarkers, we aimed to identify candidate  
48 biomarkers using publicly available RNA sequencing (RNA-seq) and proteomics data.

49 **Methods:** An approach involving unsupervised gene clustering was performed using  
50 homogeneously processed and integrated RNA-seq data of 625 liver specimens to  
51 screen for NAFLD biomarkers, in combination with public proteomics data from  
52 healthy controls and NAFLD patients. Additionally, we validated the results in the  
53 NAFLD and healthy cohorts using enzyme-linked immunosorbent assay (ELISA) of  
54 plasma and immunohistochemical staining (IHC) of liver samples.

55 **Results:** We generated a database (<https://dreamapp.biomed.au.dk/NAFLD/>) for  
56 exploring gene expression changes along NAFLD progression to facilitate the  
57 identification of genes and pathways involved in the disease's progression. Through  
58 cross-analysis of the gene and protein clusters, we identified 38 genes as potential  
59 biomarkers for NAFLD severity. Up-regulation of Quiescin sulfhydryl oxidase 1  
60 (*QSOX1*) and down-regulation of Interleukin-1 receptor accessory protein (*IL1RAP*)  
61 were associated with increasing NAFLD severity in RNA-seq and proteomics data.  
62 Particularly, the *QSOX1/IL1RAP* ratio in plasma demonstrated effectiveness in  
63 diagnosing NAFLD, with an area under the receiver operating characteristic (AUROC)  
64 of up to 0.95 as quantified by proteomics profiling, and an AUROC of 0.82 with ELISA.

65 **Conclusions:** We discovered a significant association between the levels of *QSOX1*  
66 and *IL1RAP* and NAFLD severity. Furthermore, the *QSOX1/IL1RAP* ratio shows  
67 promise as a non-invasive biomarker for diagnosing NAFLD and assessing its severity.

68

69

70 **Lay Summary**

71 This study aimed to find non-invasive biomarkers for non-alcoholic fatty liver disease  
72 (NAFLD). Researchers utilized a new gene clustering method to analyze RNA-seq data  
73 from 625 liver samples. The identified biomarkers were further validated using  
74 plasma proteomics profiling, enzyme-linked immunosorbent assay (ELISA), and liver  
75 immunohistochemical staining (IHC) in three separate groups of healthy controls and  
76 NAFLD patients. The study revealed that the levels of QSOX1 were elevated while  
77 IL1RAP levels were reduced with increasing severity of NAFLD. Importantly, the ratio  
78 of QSOX1 to IL1RAP expression in plasma showed promise as a non-invasive  
79 diagnostic tool for assessing the severity of NAFLD, eliminating the reliance on liver  
80 biopsy.

81

82 **Keywords**

83 Non-alcoholic fatty liver disease, RNA sequencing data integration, non-invasive  
84 biomarker, quiescin sulphydryl oxidase 1, interleukin-1 receptor accessory protein

85

86 **Graphical abstract**

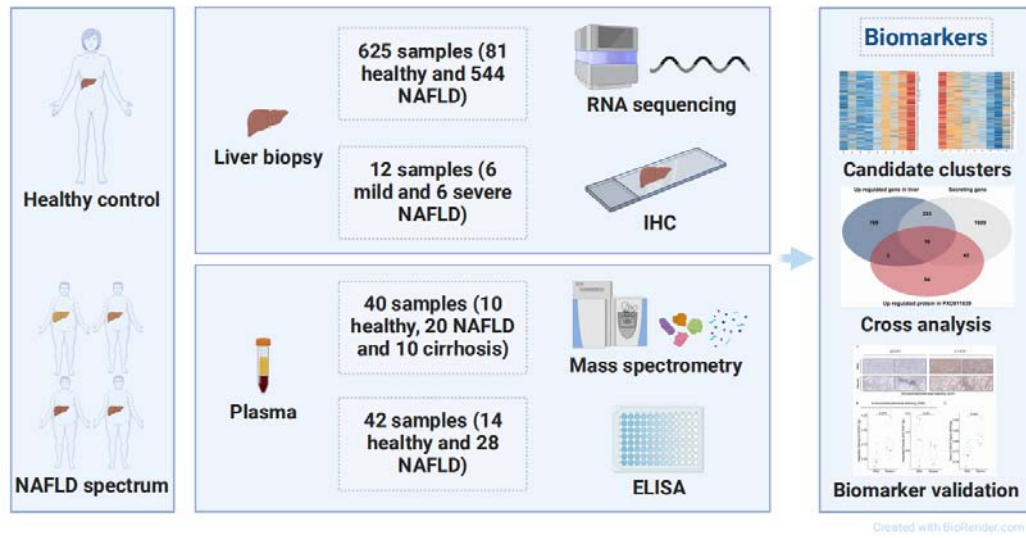

87

88

89

## 90 Introduction

91 Non-alcoholic fatty liver disease (NAFLD) is recognized as the hepatic manifestation  
92 of the metabolic syndrome, with an estimated global prevalence of around 25-32% (1,  
93 2). The severity of this liver disease ranges from Non-alcoholic Fatty Liver (NAFL) with  
94 simple steatosis to Non-alcoholic Steatohepatitis (NASH) with inflammation and  
95 fibrosis, which can progress to NASH-induced cirrhosis and increase the risk of  
96 hepatocellular carcinoma (HCC).

97

98 Liver biopsy is currently the gold standard for histological diagnosis of NAFLD despite  
99 its associated side effects such as pain, bleeding, and rare mortality. To address these  
100 drawbacks and reduce costs, there is still an unmet need for novel, precise, and  
101 cost-effective imaging tools and non-invasive biomarkers (3). Moreover, non-invasive  
102 biomarkers are highly needed for replacing repeated liver biopsies when assessing  
103 liver histology during pharmacological interventions. Existing NAFLD biomarkers  
104 primarily focus on steatosis (e.g., SteatoTest™ or the lipid accumulation product),  
105 inflammation (e.g., circulating keratin 18 fragments [CK18], soluble CD163) or fibrosis  
106 (e.g., ELF, FibroTest or Pro-C3 tests) (4-8). Despite advancements in biomarker  
107 technology, development, and evaluation, an ideal biomarker for the diagnosis,  
108 prognosis, and assessment of treatment effects in NAFLD has yet to be identified.

109

110 The traditional RNA-seq analysis approach, which relies on established tools such as  
111 edgeR (9), DESeq2 (10), and Cufflinks (11), primarily focuses on identifying  
112 differentially expressed genes (DEGs) through pairwise comparisons (12). However,  
113 for conditions like NAFLD, which involve a complex scoring system and a continuous  
114 range of histological variations, this approach has its limitations. NAFLD doesn't  
115 involve transitioning between distinct states but represents a dynamic progression  
116 through constant histopathological changes. Pairwise comparisons oversimplify the  
117 intricate genetic alterations that occur throughout NAFLD's development. What's  
118 required is a more advanced analytical method capable of capturing the gradual and

119 overlapping gene expression changes across the entire spectrum of NAFLD. Such an  
120 approach would offer a comprehensive representation of NAFLD's complexity and  
121 enhance our understanding of its progression. In recent years, advancements in  
122 technologies such as RNA sequencing (RNA-seq), single-cell analysis, and spatial  
123 transcriptomics have provided deeper insights into the molecular and cellular  
124 processes involved in NAFLD progression (13-15). Large-scale profiling efforts,  
125 combined with targeted validation approaches, have led to the discovery of potential  
126 biomarkers (16, 17). However, the majority of available RNA-seq data are derived  
127 from smaller cohorts of NAFLD patients, which limits the comprehensive  
128 understanding of NAFLD severity.

129

130 In this study, modularity optimization methods were utilized to cluster genes by  
131 employing a graph-based strategy, taking into account the gene expression patterns  
132 throughout the progression of NAFLD. We propose that integrating and analyzing  
133 these datasets with the unbiased gene-based profiling strategy will provide further  
134 insights into the molecular progression of NAFLD and the identification of biomarkers  
135 associated with NAFLD severity. In the present study, we identified over 300 NAFLD  
136 biomarkers by integrating and analyzing RNA-seq data from 625 liver  
137 samples, including their NAFLD activity scores (NAS) and fibrosis scores,  
138 along with public proteomics data. We further validated these findings in two  
139 independent NAFLD cohorts, demonstrating the potential of the QSOX1/IL1RAP ratio  
140 as a non-invasive biomarker for diagnosing NAFLD and assessing its severity.

141

## 142 **Materials and methods**

143

### 144 ***Data Collection***

145 Genome-wide RNA-seq data of human NAFLD and associated healthy controls were  
146 collected from the NCBI GEO (<https://www.ncbi.nlm.nih.gov/gds>, access date until  
147 May 2022). Only datasets that provided detailed NAS and fibrosis scores were  
148 included for further investigation, including seven datasets (GSE105127(18),

149 GSE107650(19), GSE126848(20), GSE130970(21), GSE135251(22, 23), GSE162694(24),  
150 and GSE167523(25). (**Supplementary Table 1**)

151

### 152 ***Data Normalization***

153 The SRA-formatted data were converted into FASTQ format using 'SraToolkit'  
154 (sratoolkit.2.8.2-1-centos\_linux64) (<https://github.com/ncbi/sra-tools>). Sequencing  
155 reads were aligned to the hg19 UCSC RNA sequences Genome Reference Consortium  
156 Human Build 37 (GRCh37) using 'bowtie2' (bowtie2-2.2.5)  
157 (<https://rnh.github.io/bioinfo-notebook/docs/bowtie2.html>). Only protein-coding  
158 transcripts were considered, and Transcript Per Million (TPM) values were obtained  
159 by transforming the mapped transcript reads using 'RSEM' (rsem-1.2.12)  
160 (<https://github.com/deweylab/RSEM>). Then, TPM values were then subjected to  
161 Trimmed Mean of M-values (TMM) normalization across all samples using  
162 'metaseqR' (metaseqR 1.12.2) (26). The data from various sources involved in this  
163 study were integrated and log<sub>1p</sub>-transformed, followed by batch correction using the  
164 'removeBatchEffect' function in the R package 'limma' (limma 3.54.2)  
165 (<https://kasperdanielhansen.github.io/genbioconductor/html/limma.html>) (27).  
166 Subsequently, the data were expanded (10<sup>x</sup>) for further analysis (**Figure 1A**).

167

### 168 ***RNA-seq Data Analysis and Database Construction***

169 After normalization and batch correction, the RNA-seq data were subjected to  
170 Principal Components Analysis (PCA) and unsupervised clustering using the R  
171 package 'Seurat' (Seurat-4.3.0)  
172 ([https://satijalab.org/seurat/articles/get\\_started.html](https://satijalab.org/seurat/articles/get_started.html)). We utilized the  
173 "LogNormalize" method for global-scaling normalization, which normalized the  
174 feature expression measurements across different samples for each gene by the total  
175 expression. The normalized values were multiplied by a scale factor (default:  
176 10,000) and log<sub>1p</sub>-transformed. Subsequently, scaling was applied to the identified  
177 variable features (default: 2,000). PCA was then performed on the scaled data, with a  
178 default setting of computing and storing 50 Principal Components (PCs). To cluster



179 the genes, we employed modularity optimization techniques using a graph-based  
180 clustering approach. The dimensions of reduction were set to 1:20, and  
181 the resolution parameter was set to 2.3 (28).

182

183 To show the gene expression variation during the development of NAFLD associated  
184 with both NAS and fibrosis scores, we generated an RNA-seq database using  
185 'ShinyCell' (<https://github.com/SGDDNB/ShinyCell>). This database was deployed at  
186 <https://dreamapp.biomed.au.dk/NAFLD/>.

187

### 188 ***Proteomics Data Collection and Analysis***

189 The proteomics cohort dataset (PXDO11839) includes 10 healthy controls, 10 NAFLD  
190 patients with normal glucose tolerance (NAFLD\_ngt), 10 NAFLD patients with type 2  
191 diabetes (NAFLD\_T2D), and 10 NAFLD patients with cirrhosis (29). We performed the  
192 statistical analysis using R-4.3.0 on the dataset (EV1, tab4)  
193 (<https://www.ncbi.nlm.nih.gov/pmc/articles/PMC6396370/bin/MSB-15-e8793-s003.xlsx>).  
194 The NAFLD\_ngt and NAFLD\_T2D groups were merged into a single NAFLD group,  
195 resulting in three groups: healthy controls, NAFLD, and cirrhosis.

196

197 Similar to RNA-seq analysis, we used 'Seurat' (Seurat-4.3.0) and employed the  
198 "LogNormalize" method for global-scaling normalization. This method normalized  
199 the feature expression measurements across different samples for each protein by  
200 the total expression. The normalized values were multiplied by a scale factor (default:  
201 10,000) and log<sub>1p</sub>-transformed. Subsequently, scaling was applied to the identified  
202 variable features (default: 2,000). PCA was performed on the scaled data, with a total  
203 of 39 Principal Components (PCs) computed and stored. Additionally, we calculated  
204 the log fold-change of the average expression between two groups (avg\_log2FC) by  
205 comparing the health and NAFLD groups, as well as the NAFLD and cirrhosis groups.  
206 By setting avg\_log2FC > 0, we selected up- and down-regulated proteins associated  
207 with increasing severity of NAFLD.

208

209 ***Validation of QSOX1 and IL1RAP as Biomarkers in NAFLD***

210 Our objective was to investigate whether *QSOX1* and *IL1RAP* gene expression levels,  
211 as well as their encoded proteins, could predict the histological severity of NAFLD. To  
212 address this question, we examined the plasma concentrations of QSOX1 and IL1RAP  
213 in the proteomics data of healthy and NAFLD cohorts. Additionally, we conducted  
214 enzyme-linked immunosorbent assay (ELISA) tests for plasma QSOX1/IL1RAP in a  
215 cohort comprising healthy subjects and NAFLD patients recruited at Shenzhen  
216 Traditional Chinese Medicine Hospital, China (SZTCMH).

217

218 ***Human Samples***

219 A total of 28 ultrasound-proven adult NAFLD patients, including NAFLD\_ngt and  
220 NAFLD\_T2D, and 14 healthy controls were enrolled from SZTCMH. Other diagnoses  
221 and etiologies, such as excessive alcohol consumption, viral hepatitis, autoimmune  
222 liver disease, and the use of steatogenic compounds, were excluded. Archived  
223 plasma samples were collected between October and December 2022. Informed  
224 consent was obtained from the healthy subjects and NAFLD patients, following the  
225 approved clinical protocols of the Ethical Committee of SZTCMH. Clinical information,  
226 including body mass index (BMI) and standard biochemistry (liver, kidney,  
227 hematology) with metabolic profiling (glucose, insulin, lipids), was collected.  
228 Fibroscan with controlled attenuation parameter (CAP) values was performed to  
229 assess fibrosis and steatosis. Clinical information for the healthy controls and NAFLD  
230 patients can be found in **Supplementary Table 5**.

231

232 For immunohistochemical staining (IHC), 12 fixed liver tissues were collected from  
233 archived histological samples at SZTCMH between 2014 and 2023. These samples  
234 were scored based on the NAS score (N0 to N8) and fibrosis score (F0 to F4) by two  
235 pathologists (MMS and XWY). Six samples were from mild NAFLD patients (N0-4,  
236 F0-2), and six were from severe NAFLD patients (N5-8, F3-4). The clinical study was  
237 approved by the Ethical Committee of SZTCMH, and the approved clinical protocols  
238 adhere to the Helsinki Declaration (No. K2022-174-01).

239

240 **ELISA**

241 Blind ELISA tests were conducted on the collected plasma samples. Randomly  
242 assigned sample identifiers and positions were used to ensure blindness to the  
243 clinical information and NAFLD stages. The levels of QSOX1 and IL1RAP were  
244 measured using QSOX1 ELISA Kits (Catalog No. YJ145587, Lot No. 12/2022 from  
245 Enzyme-linked Biotechnology, Shanghai, China) and IL1RAP ELISA Kits (Catalog No.  
246 YJ130558, Lot No. 12/2022 from Enzyme-linked Biotechnology, Shanghai, China),  
247 respectively. The measurements followed the manufacturer's instructions and the  
248 absorbance values were measured at 450nm. To ensure the reliability of the ELISA  
249 Kits, a pre-experiment was conducted three times before the formal experiment.

250

251 ***Immunohistochemistry Assay***

252 We examined the association of QSOX1 and IL1RAP with human NAFLD severity by  
253 performing IHC on formalin-fixed and paraffin-embedded liver sections from 6 mild  
254 NAFLD patients and 6 severe NAFLD patients. The 3 µm-thick paraffin sections were  
255 deparaffinized and rehydrated with distilled water. Antigen retrieval was carried out  
256 using pH 9.0 EDTA buffer, followed by 20 minutes of boiling and washing with 1X PBS.  
257 Subsequently, the slides were blocked with 1% bovine serum albumin in 1X PBS for  
258 15 minutes and then incubated overnight at 4°C with QSOX1 (Rabbit anti-human,  
259 Catalog No. Ab235444, Lot No. GR3386311-2 from Abcam) or IL1RAP (Rabbit  
260 anti-human, Catalog No.35605, Lot No. 4926 from Sabbiotech) antibodies at a  
261 concentration of 20 µg/ml. The following day, the slides were washed with 1X PBS  
262 and incubated with Goat anti-rabbit IgG H&L (Catalog No. Ab205718, Lot No.  
263 ab205718 from Abcam) for 15 minutes at room temperature, followed by another  
264 wash with 1X PBS. The images were captured using a light microscope and  
265 3DHISTECH digital scanner (<https://www.3dhistech.com/>).

266

267 The IHC results were analyzed using the software tool 'ImagineJ (Fiji)'. To prevent

268 potential bias, we randomly selected five locations of the same size from each  
269 sample at 20x magnification using 3DHISTECH CaseViewer\_2.4  
270 (<https://www.3dhistech.com/solutions/caseviewer/>). Using 'ImagineJ', we applied  
271 the "Colour Deconvolution" tool with vectors=[H DAB]; followed by selecting the  
272 Colour\_2 pictures and running "8-bit". Standard thresholds were used (QSOX1:  
273 setThreshold (60, 230), IL1RAP: setThreshold (94, 214)) (30, 31). The average  
274 integrated density from the five sites was calculated and used as the integrated  
275 density value for each sample, which was then subjected to statistical analysis.

276

### 277 ***Statistical analysis***

278 The significance for all statistical tests was two-sided, with  $P < 0.05$ . All data analysis  
279 was presented in the plots using R-4.3.0, and MedCalc was used to calculate the  
280 AUROC, sensitivity, specificity, optimal cutoff value, and sample size.

## 281 **Results**

### 282 **Overview of RNA-seq data and NAFLD patient cohorts**

283 After applying stringent filtering criteria based on the availability of histological NAS  
284 and fibrosis scores, five datasets including GSE115193 (32), GSE134422 (33),  
285 GSE135448 (34), GSE160016 (35), and GSE164441 (36) were excluded from the  
286 analysis, while seven datasets (GSE105127 (18), GSE107650 (19), GSE126848 (20),  
287 GSE130970 (21), GSE135251 (22, 23), GSE162694 (24), and GSE167523 (25)) were  
288 included. These datasets collectively comprise 81 healthy controls (including healthy  
289 obese individuals) (NOFO) and 544 NAFLD patients. The severity of NAFLD patients  
290 was classified based on the NAS score (ranging from N1 to N8) and the fibrosis score  
291 (ranging from F0 to F4) using the scoring systems proposed by Brunt (37) and Kleiner  
292 (38), respectively (**Table 1, Supplementary Table 1**). A positive correlation was  
293 observed between NAS and fibrosis scores (Pearson  $R = 0.64$ ,  $P = 4.94E-74$ , **Table 1**),  
294 indicating an association with NAFLD severity.

295

### 296 **Normalization and Integration of RNA-seq Data**

297 To address the issue of batch effects resulting from differences in sequencing  
298 technology and studies, we processed the integrated data as depicted in **Figure 1A**.  
299 Genes with low expression were filtered out, resulting in a total of 17,946  
300 protein-coding genes. Principal component analysis (PCA) demonstrated that  
301 normalization effectively eliminated noticeable batch effects (**Figure 1B**). Moreover,  
302 neither the NAS nor fibrosis scores appeared to be the main factors contributing to  
303 sample separation (**Figure 1D, E**). Instead, the normalized RNA abundance (nCount)  
304 in each sample emerged as the key component influencing transcriptome profiles  
305 (**Figure 1C**).

306

### 307 **Unsupervised Gene Clustering Identifies Clusters of Genes Associated with NAFLD** 308 **Severity.**

309 To identify genes associated with NAFLD severity, we utilized a previously developed

310 unsupervised gene clustering method based on the similarity of gene expression  
311 patterns across each sample (39). We employed gene clustering, grouping genes  
312 according to their expression patterns during the progression of NAFLD. By setting a  
313 resolution of 2.3, we identified a total of 37 gene clusters (**Supplementary Figure S1**).  
314 Notably, cluster 4, consisting of 1021 genes, consistently exhibited increased  
315 expression with higher NAS and fibrosis scores (**Figure 2A, Supplementary Figure**  
316 **S2A**). Conversely, cluster 14, comprising 643 genes, showed decreased expression  
317 with increasing NAS and fibrosis scores (**Figure 2B, Supplementary Figure S2B**). As  
318 illustrated in figures (**Figure 2A, B, Supplementary Figure S2A, B, C, D**), this approach  
319 efficiently clustered genes into distinct groups based on their expression patterns  
320 across NAFLD severity stages. It offers a more structured depiction of gene  
321 expression variations, enabling a deeper understanding of NAFLD's molecular  
322 pathogenesis. Through visualizing and categorizing these gene expression changes,  
323 we can acquire a more comprehensive insight into the underlying mechanisms and  
324 factors that propel NAFLD progression.

325

326 To explore the biological functions of these gene clusters, we performed Gene  
327 Ontology (GO) analysis using the R package 'ClusterProfiler' (ClusterProfiler-4.8.0).  
328 Specifically, we focused on cluster 4, which consisted of up-regulated genes. The GO  
329 analysis revealed significant enrichment of genes involved in the fibrosis-related  
330 process, such as extracellular matrix (ECM) organization (p.adjust = 9.77E-34),  
331 extracellular structure organization (p.adjust = 9.77E-34), external encapsulating  
332 structure organization (p.adjust = 1.09E-33), and cell-substrate adhesion (p.adjust =  
333 3.35E-17). Notably, the expression of multiple genes involved in the ECM processes,  
334 such as *COL5A3*, *FBLN5*, *SPINT2*, *COL1A1*, *COL1A2*, *COL3A1*, *COL4A1*, *COL4A4*,  
335 *COL12A1*, *COL15A1*, and *COL16A1*, showed a gradual up-regulation during the  
336 progression of NAFLD (**Figure 2A, Supplementary Figure S3**).

337

338 In contrast, cluster 14, which displayed a reverse correlation with NAS and fibrosis  
339 scores, was significantly enriched in metabolic processes, indicating an association

340 between NAFLD progression and attenuated liver metabolism. The down-regulated  
341 genes in this cluster were particularly enriched in processes such as organic acid  
342 catabolic process (p.adjust = 2.57E-22), carboxylic acid catabolic process (p.adjust =  
343 2.57E-22), small molecule catabolic process (p.adjust = 5.28E-22), alpha-amino acid  
344 metabolic process (p.adjust = 6.03E-20), fatty acid metabolic process (p.adjust =  
345 2.60E-10), and alcohol metabolic process (p.adjust = 1.35E-09). Notably, genes  
346 encoding enzymes of the Cytochrome P450 superfamily, including *CYP1A2*, *CYP2C19*,  
347 *CYP2J2*, *CYP2E1*, *CYP4A11*, *CYP4A22*, *CYP4F11*, *CYP2C8*, and *CYP3A4*, were  
348 down-regulated with increasing NAFLD severity (**Figure 2B, Supplementary Figure**  
349 **S4**). For a comprehensive list of all enriched GO terms for genes in cluster 4 and 14,  
350 please refer to **Supplementary Table 2**.

351

352 In addition, we developed a NAFLD gene expression database (NAFLD-DB) to  
353 facilitate the exploration and comparison of all identified protein-coding genes based  
354 on NAFLD severity. The NAFLD-DB (<https://dreamapp.biomed.au.dk/NAFLD/>) was  
355 constructed using the ShinyCell framework (40), which was specifically designed for  
356 convenient exploration and sharing of single-cell transcriptome data.

357

### 358 **Identification of Candidate Diagnostic Biomarkers**

359 We employed an additional complementary strategy to further refine our list of  
360 candidate genes. In this approach, we first analyzed the plasma protein levels from a  
361 NAFLD cohort in a proteomics dataset (PXD011839) (29). We selected proteins that  
362 showed positive correlations with increasing NAFLD severity (avg\_log2FC > 0) and  
363 proteins that showed negative correlations. As a result, we identified 148  
364 up-regulated proteins and 114 down-regulated proteins associated with increasing  
365 NAFLD severity (**Figure 2C, D**).

366

367 The secretome, which consists of secreted proteins, has emerged as a valuable  
368 resource for disease diagnostics (41-43). In our study, we aim to identify potential  
369 diagnostic markers among the candidate genes, by comparing our gene clusters with

370 the secretome database from the Human Protein Atlas (44). This cross-analysis  
371 revealed a total of 349 genes encoding secreted proteins, with 249 genes showing  
372 up-regulation and 100 genes showing down-regulation (**Figure 2E**). Notably, our  
373 approach successfully identified a comprehensive list of previously known NAFLD  
374 diagnostic and prognostic markers, including *ADAMTSL2* (45), *AEBP1* (46), and *BGN*  
375 (47) (**Supplementary Table 3**), further validating the effectiveness of our approach.

376

377 Next, we intersected the protein-encoding genes of these proteins with the  
378 secretome genes and the candidate genes generated from our RNA-seq analysis.  
379 Through this cross-comparison, we identified 16 up-regulated secreting genes (*A2M*,  
380 *C7*, *COL6A3*, *COLEC11*, *ENPP2*, *FBLN1*, *FBN1*, *FCGBP*, *IGFBP6*, *LCN2*, *LUM*, *MMP2*,  
381 *PAPLN*, *PTGDS*, *QSOX1*, *VWF*) and 22 down-regulated secreting genes (*AZGP1*, *C1RL*,  
382 *C4BPA*, *C6*, *C8B*, *CFHR3*, *CNDP1*, *F2*, *GC*, *HP*, *HPR*, *IL1RAP*, *ITIH1*, *ITIH2*, *ITIH4*, *KLKB1*,  
383 *PON3*, *SERPINA10*, *SERPINC1*, *SERPING1*, *SMPDL3A*, *TTR*) associated with increasing  
384 NAFLD severity in both the RNA-seq and proteomics data (**Supplementary Figure S5**).

385

### 386 **QSOX1 and IL1RAP are promising biomarkers for NAFLD severity**

387 To demonstrate the applicability of our NAFLD-DB and validate the association of  
388 differential gene expression with increasing NAFLD severity, we selected two  
389 representative genes, *QSOX1* and *IL1RAP*, which showed positive and negative  
390 correlations with increasing NAFLD severity, and their roles as biomarkers were  
391 under explored as compared to other NAFLD biomarkers (**Supplementary Figure S5**).

392 We examined their expression levels in comparison to patients with a NAS or fibrosis  
393 score of 0 (N0 or F0). The expression of *QSOX1* was significantly correlated with the  
394 severity of NAFLD compared to N0 or F0 patients: N1-4 ( $p = 0.003$ ), N5-8 ( $p =$   
395  $1.9E-10$ ), F1-2 ( $p = 0.001$ ), F3-4 ( $p = 6.5E-8$ ) (**Figure 3A, B**). On the other hand, *IL1RAP*  
396 expression was significantly lower in patients with increased NAFLD severity  
397 compared to N0 or F0: N1-4 ( $p = 1E-5$ ), N5-8 ( $p = 4.7E-10$ ), F1-2 ( $p = 0.00012$ ), F3-4 ( $p$   
398  $= 0.00013$ ) (**Figure 3C, D**).

399



400 Since *QSOX1* and *IL1RAP* exhibited opposite correlations with NAFLD severity, we  
401 further explored whether the ratio of *QSOX1/IL1RAP* could better distinguish  
402 between patient groups. Our results showed that compared to NO or FO patients, the  
403 ratio of *QSOX1* to *IL1RAP* mRNA levels showed even greater separation: N1-4 ( $p =$   
404  $7.6E-8$ ), N5-8 ( $5.9E-16$ ), F1-2 ( $4.6E-6$ ), F3-4 ( $6.8E-8$ ) (**Figure 3E, F**). These findings  
405 suggest that the *QSOX1/IL1RAP* ratio has the potential as a biomarker for diagnosing  
406 NAFLD severity.

407

#### 408 **Validation of Plasma *QSOX1/IL1RAP* Levels as Biomarkers for NAFLD Severity with** 409 **NAFLD Proteomics Cohort**

410 To further validate the potential of *QSOX1* and *IL1RAP* as biomarkers for NAFLD  
411 severity, we analyzed the plasma levels of *QSOX1* and *IL1RAP* in a NAFLD proteomics  
412 cohort (PXD011839) previously conducted by Niu L and colleagues (29). Consistent  
413 with our liver RNA profiling results in livers, the analysis of plasma proteomics data  
414 from this independent NAFLD cohort showed a significant increase in plasma *QSOX1*  
415 levels in patients with NAFLD (Wilcoxon rank sum test,  $p = 0.021$ ) and cirrhosis ( $p =$   
416  $0.049$ ) compared to healthy controls (**Figure 4A**). Conversely, *IL1RAP* levels were  
417 significantly reduced in patients with NAFLD ( $p = 5.8E-5$ ) and cirrhosis ( $p = 0.0011$ )  
418 (**Figure 4B**). Moreover, when considering the combined marker of plasma  
419 *QSOX1/IL1RAP* ratio, it demonstrated even greater significance in distinguishing  
420 NAFLD ( $p = 9.3E-6$ ) and cirrhosis ( $p = 0.00013$ ) patients from the control group,  
421 compared to using *QSOX1* or *IL1RAP* alone (**Figure 4C**).

422

423 To assess the diagnostic sensitivity and specificity of *QSOX1*, *IL1RAP*, and their ratio  
424 for NAFLD severity, we conducted ROC curve analysis using the 'MedCalc' tool (30).  
425 The sample sizes for each comparison were evaluated and are listed in  
426 **Supplementary Table 4**. The AUROC of the *QSOX1/IL1RAP* ratio for distinguishing  
427 NAFLD patients from healthy controls was 0.95, with a cutoff value of 1.12. The  
428 sensitivity was determined to be 90%, and the specificity was 100%. Notably, the  
429 efficacy of the *QSOX1/IL1RAP* ratio was superior to that of *IL1RAP* alone

430 (AUROC=0.92) or QSOX1 alone (not significant). Similarly, when assessing the  
431 differentiation between cirrhosis patients and healthy controls, the AUROC of the  
432 QSOX1/IL1RAP ratio was 0.96, with a cutoff value of 1.12. The sensitivity was 90%,  
433 and the specificity was 100%.

434

435 These results indicate that the QSOX1/IL1RAP ratio holds promise as a highly  
436 effective biomarker for diagnosing NAFLD severity, surpassing the individual  
437 biomarkers alone, and maintaining better sensitivity and specificity in distinguishing  
438 NAFLD patients and cirrhosis patients from healthy individuals.

439

#### 440 **Validation of QSOX1 and IL1RAP as biomarkers for NAFLD in another patient cohort**

441 To further validate the utility of QSOX1 and IL1RAP as biomarkers for NAFLD, we  
442 conducted a validation study in healthy controls and NAFLD patients recruited from  
443 the Department of Liver Disease of Shenzhen Traditional Chinese Medicine Hospital.  
444 Plasma samples were collected from 14 healthy subjects and 28 newly diagnosed  
445 NAFLD patients. Clinical information for the healthy controls and NAFLD patients can  
446 be found in **Supplementary Table 5**.

447

448 We measured plasma levels of QSOX1 and IL1RAP using an enzyme-linked  
449 immunosorbent assay (ELISA). Consistent with our previous findings, plasma levels of  
450 QSOX1 (Wilcoxon rank sum test,  $p = 0.043$ ), IL1RAP ( $p = 0.035$ ), and the  
451 QSOX1/IL1RAP ratio ( $p = 0.00061$ ) were significantly different between NAFLD  
452 patients and controls (**Figure 4D, E, F**).

453

454 To assess the diagnostic value of QSOX1 and IL1RAP as non-invasive biomarkers for  
455 NAFLD by ELISA, we calculated the AUROC of the QSOX1/IL1RAP ratio in the ELISA  
456 test to distinguish NAFLD patients from healthy controls. The QSOX1/IL1RAP ratio  
457 exhibited an AUROC of 0.82. Using a cutoff of 0.05, the sensitivity was 93% and the  
458 specificity was 57%. In comparison, the AUROC of QSOX1/IL1RAP ratio quantified by  
459 ELISA showed less efficacy in distinguishing NAFLD patients from healthy controls

460 (Supplementary Table 4), which may be attributed to the sensitivity of protein  
461 quantification methods and small sample size.

462

463 To further validate the association between QSOX1 and IL1RAP protein levels and  
464 NAFLD severity, we assessed their levels in liver biopsies from mild and severe NAFLD  
465 patients using IHC. Our results consistently demonstrated a significant correlation  
466 between QSOX1 and IL1RAP levels and NAFLD severity (Figure 5A). Quantification of  
467 QSOX1 and IL1RAP levels based on IHC confirmed that the QSOX1/IL1RAP ratio ( $p =$   
468 0.027) could distinguish the severe NAFLD group ( $n=6$ ; NAS 5-8, fibrosis score 3-4)  
469 from the mild NAFLD group ( $n=6$ ; NAS 0-4, Fibrosis score 0-2) (Figure 5B, C).  
470 Collectively, these findings suggest that the QSOX1/IL1RAP ratio holds promise as an  
471 effective biomarker for the early diagnosis and prediction of NAFLD severity.

## 472 **Discussion**

473 This study is the first to integrate publicly available RNA-seq datasets from over 600  
474 NAFLD patients with varying stages of disease severity, combined with proteomics  
475 data analysis of publicly available datasets. The key findings suggest that the  
476 QSOX1/IL1RAP, and particularly the QSOX1/IL1RAP ratio hold promise as potential  
477 biomarkers for NAFLD severity assessment. These results align with recent research  
478 highlighting the importance of different transcriptional profiles specific to NAS and  
479 fibrosis scores, offering valuable insights into the molecular mechanisms driving  
480 disease progression from simple steatosis to inflammation and fibrosis (21, 24).

481

## 482 **The Advantages of Utilizing Integrated RNA-seq Data for Investigating NAFLD** 483 **Biomarkers**

484 Despite the growing availability of RNA-seq data in this field, many original studies  
485 have been limited by small sample sizes and biased sample distribution, making it  
486 challenging to accurately decipher transcriptional differences across various stages of  
487 NAFLD(18, 20-22, 24). Several studies have attempted to identify diagnostic  
488 biomarkers and potential drug targets. For instance, Brosch et al. conducted a  
489 positional analysis of transcriptomes across three micro-dissected liver zones from 19  
490 NAFLD patients (18). Suppli et al. demonstrated that immunohistochemical markers  
491 offer greater objectivity in distinguishing hepatocyte injury between NASH and NAFL  
492 (20). In the pursuit of diagnostic genes and novel drug targets, Hoang et al. studied 6  
493 histologically normal and 72 NAFLD patients, while Pantano et al. studied 31  
494 histologically normal and 112 NAFLD patients. These studies revealed that specific  
495 cells proportion and candidate gene signatures can accurately predict fibrosis stage  
496 and disease progression (21, 24). Likewise, Govaere et al. observed the correlation  
497 between gene expression and histology in a cohort of 10 controls and 206 NAFLD  
498 patients (22). In contrast to the studies above that identified sets of potential  
499 biomarker genes, Kozumi et al. validated thrombospondin 2 (THBS2) as a noninvasive  
500 biomarker for NAFLD. They confirmed its potential in identifying the disease stages

501 among 98 NAFLD patients, and the serum levels of its encoded protein TSP-2,  
502 measured by ELISA, showed an AUROC of 0.78 in the diagnosing of NASH among 213  
503 patients with biopsy-proven NAFLD (25). The major challenge of combining and  
504 analyzing these diverse datasets lies in achieving homogeneous processing, which  
505 requires substantial time and computational resources (48, 49). To generate more  
506 robust and compelling results, we employed unbiased integration of comprehensive  
507 NAFLD data to profile the liver transcriptome across a broad spectrum of NAFLD  
508 severity in our study, incorporating all the aforementioned samples.

509

### 510 **The Superiority of QSOX1 and IL1RAP as Potential Biomarkers of NAFLD**

511 The high prevalence and associated risks of NAFLD have driven global efforts to  
512 identify improved diagnostic biomarkers. However, most existing biomarkers are  
513 primarily suited for evaluating fibrosis (3, 50-52). The Fibrosis-4 (FIB-4) test  
514 commonly used in clinical practice, is sub-optimal for screening purposes, as it carries  
515 the risks of both overdiagnosis and false negatives, particularly in patients at risk of  
516 chronic liver disease (8). Although the patented ELF™ test was highly recommended  
517 for ruling out advanced fibrosis, it comes with higher costs. Several steatosis scores,  
518 such as the SteatoTest™ and the fatty liver index (FLI), have been proposed for  
519 steatosis detection, but they do not provide substantial additional information  
520 beyond routine clinical, laboratory, and imaging examinations conducted in  
521 patients suspected of having NAFLD(8). Non-coding RNAs (ncRNAs), which exhibit  
522 aberrant expression associated with NAFLD, have emerged as potential biomarkers  
523 for NAFLD pathology, and circulating ncRNAs including miR-122 and lncRNAs are  
524 proposed as potential biomarkers for NAFLD severity and progression (53-59).  
525 Despite the development of new biomarkers, there is still uncertainty surrounding  
526 their predictive value, underscoring the urgent need to develop novel, cost-effective,  
527 and efficient biomarkers with high sensitivity and specificity for NAFLD prediction  
528 and monitoring (4, 60).

529

530 The approach by Hoang et al. (21) centered on identifying genes with diverse

531 expressions associated with NAFLD severity, inspired us to develop our gene  
532 clustering method. Our approach surpasses the constraints of conventional RNA-seq  
533 data analysis, which predominantly relies on pairwise comparisons. Instead, it  
534 classifies genes according to their dynamic expression patterns, enabling a more  
535 comprehensive and dynamic perspective of molecular alterations as NAFLD  
536 progresses. This method has the potential to map NAFLD severity and progression  
537 solely through gene expressions, thus avoiding invasive procedures like liver biopsies.  
538 Moreover, the gene-based scoring system can forecast NAFLD progression,  
539 facilitating early interventions for patients at risk of advancing to severe disease  
540 stages.

541

542 Previous studies have explored the relationship between QSOX1, IL1RAP, and NAFLD  
543 or steatosis(16, 61). QSOX1 has been suggested as a potential diagnostic biomarker  
544 for NAFLD, playing a significant role in lipid metabolism as an enzyme expressed in  
545 various tissues, particularly in quiescent fibroblasts (18, 62, 63). IL1RAP is localized in  
546 vesicles and cytosol, and it is secreted into the bloodstream. Notably, IL1RAP  
547 expression at the RNA level was specifically detected in the liver and hepatocytes  
548 (44). Hence, the combination of QSOX1 and IL1RAP as secretome genes and proteins  
549 was selected as a potential biomarker combination.

550

551 The potential of QSOX1, IL1RAP, and their ratio as biomarkers for NAFLD was  
552 demonstrated through the analysis of public RNA-seq and proteomics data, ELISA  
553 tests conducted on patients' plasma, and IHC performed on fixed liver slides. These  
554 findings suggest that QSOX1, IL1RAP, and their ratio hold promise as effective  
555 biomarkers for NAFLD. Notably, the higher AUROC values for NAFLD diagnosis  
556 achieved by QSOX1, IL1RAP, and their ratio highlight their efficacy as NAFLD  
557 biomarkers.

558

#### 559 **Limitation and Future Prospects.**

560 The current study possesses several strengths, including the integration and

561 processing of RNA-seq data from over 600 NAFLD patients with varying degrees of  
562 NAFLD severity, as well as validation using proteomics data and samples from NAFLD  
563 patients and controls. Furthermore, the well-established database with a  
564 user-friendly interface could benefit the research community in exploring  
565 differentially expressed genes in NAFLD at various stages. However, there are also  
566 limitations to consider. For instance, some samples in the GSE126848 and GSE167523  
567 datasets lacked individual NAS and fibrosis scores. To address this issue,  
568 we standardized scores based on their categories in the original articles, and the  
569 impact on the results was deemed negligible due to the provision of general stages  
570 and unsupervised gene clustering. Machine learning, an essential tool for biomarker  
571 validation and sample classification validation, should be employed to train large  
572 cohorts of biopsy-proven NAFLD patients and healthy controls. However, this would  
573 require an extended recruiting period (64) to determine the sensitivity and specificity  
574 of the QSOX1/IL1RAP ratio for NAFLD diagnosis and staging.

575

576 Although newer technologies such as single-cell RNA sequencing (scRNA-seq) and  
577 spatial sequencing have gained popularity, RNA-seq still serves as a valuable tool in  
578 uncovering the pathogenesis of NAFLD (17). Computational analysis limitations make  
579 it impractical for large cohort research, and single-cell suspension processing may  
580 affect cell abundance and cell type representation, particularly in hepatic ballooning  
581 cells in NAFLD (65). Single-nuclei RNA sequencing (snRNA-seq) captures cell  
582 frequency more accurately than scRNA-seq but captures lower gene expression.  
583 Spatial transcriptomics and proteomics have limitations for discovering invasive  
584 biomarkers of NAFLD as they focus on small sampling areas (15). The combination of  
585 all these biological tools holds potential for future research.

586

587 In conclusion, through a novel approach of unsupervised gene clustering performed  
588 on integrated RNA-seq data, we have discovered a significant association between  
589 QSOX1 and IL1RAP levels and NAFLD severity, with their ratio showing potential as a  
590 non-invasive biomarker for diagnosing and assessing the severity of NAFLD.

591 Validation of our plasma-level findings in larger cohorts of liver biopsies is required,  
592 but it holds promise as a new tool to diagnose NAFLD severity and reduce the need  
593 for liver biopsies. Our approach may lead to the discovery of more NAFLD biomarkers,  
594 and the ratios of other up-regulated and down-regulated genes associated with  
595 increasing NAFLD severity also have the potential to be verified as potential  
596 biomarkers.

597

## 598 **Abbreviations**

599 AUROC, area under the receiver operating characteristic; avg\_log2FC, log fold-change  
600 of the average expression between the two groups; BMI, body mass index; CK18,  
601 circulating keratin 18 fragments; ECM, extracellular matrix; ELISA, enzyme-linked  
602 immunosorbent assay; F, Fibrosis score; FIB-4, Fibrosis-4; GEO, Gene Expression  
603 Omnibus; GO, Gene Ontology; GRCh37, Genome Reference Consortium Human Build  
604 37; HCC, hepatocellular carcinoma; IHC, immunohistochemistry staining; IL1RAP,  
605 Interleukin-1 receptor accessory protein; lg, log<sub>10</sub>; PCA, Principal components  
606 analysis; QSOX1, Quiescin sulfhydryl oxidase 1; RNA-seq, RNA sequencing; N, NAS  
607 score; NAFL, Non-alcoholic Fatty Liver; NAFLD, Non-alcoholic fatty liver disease;  
608 NAFLD-DB, NAFLD gene expression database; NAFLD\_ngt, NAFLD with normal  
609 glucose tolerance; NAFLD\_T2D, NAFLD with type 2 diabetes; NAS, NAFLD activity  
610 scores; NASH, Non-alcoholic Steatohepatitis; ncRNAs, non-coding RNAs; scRNA-seq,  
611 single-cell RNA sequencing; snRNA-seq, Single-nuclei RNA sequencing; SZTCMH,  
612 Shenzhen Traditional Chinese Medicine Hospital, China; THBS2, thrombospondin 2;  
613 TMM, Trimmed Mean of M-values; TPM, Transcript Per Million.

614

## 615 **Financial support**

616 This research was funded by the Shenzhen Science and Technology Project and  
617 Sanming Project of Medicine in Shenzhen, China (grant nos. SZSM201612074,  
618 JCYJ20210324120405015).

619



## 620 **Authors' contributions**

621 YLL, HG, WFM and LL designed the study and interpreted the data. The analysis  
622 strategy has been developed by LL and WFM. WFM, JRH, BQC, MLL, XZ, SMX and  
623 MBK collected and assembled the data. WFM drafted the manuscript. WFM, JRH and  
624 LC performed data analysis and/or interpretation. Technical support: YLL, LL, JRH, ZXZ,  
625 MMS and XWY. Study participant inclusion: ZXZ, WFM, BQC, MLL, XZ, SMX, BLZ, QL,  
626 QH, MQM. All authors reviewed and approved the final version of the manuscript.

627

## 628 **Data and code availability statement**

629 The data that support the findings of this study are available from the corresponding  
630 author upon reasonable request.

631

## 632 **Conflict of interest**

633 Henning Grønbaek has received research grants from Abbvie, Intercept, ARLA Food  
634 for Health, ADS AIPHIA Development Services AG. Consulting Fees from Ipsen, NOVO,  
635 Pfizer. Lecturer for AstraZeneca and Eisai; and on Data Monitoring Committee at  
636 CAMURUS AB. All other authors have no conflicts of interest to declare.

637

## 638 **Reference**

- 639 1. Lazarus JV, Mark HE, Anstee QM, Arab JP, Batterham RL, Castera L, Cortez-Pinto H, et al.  
640 Advancing the global public health agenda for NAFLD: a consensus statement. *Nat Rev Gastroenterol*  
641 *Hepatol* 2022;19:60-78.
- 642 2. Riazi K, Azhari H, Charette JH, Underwood FE, King JA, Afshar EE, Swain MG, et al. The prevalence  
643 and incidence of NAFLD worldwide: a systematic review and meta-analysis. *Lancet Gastroenterol*  
644 *Hepatol* 2022;7:851-861.
- 645 3. Nassir F. NAFLD: Mechanisms, Treatments, and Biomarkers. *Biomolecules* 2022;12.
- 646 4. Vilar-Gomez E, Chalasani N. Non-invasive assessment of non-alcoholic fatty liver disease: Clinical  
647 prediction rules and blood-based biomarkers. *J Hepatol* 2018;68:305-315.
- 648 5. Kazankov K, Barrera F, Moller HJ, Rosso C, Bugianesi E, David E, Younes R, et al. The macrophage  
649 activation marker sCD163 is associated with morphological disease stages in patients with  
650 non-alcoholic fatty liver disease. *Liver Int* 2016;36:1549-1557.
- 651 6. Anstee QM, Castera L, Loomba R. Impact of non-invasive biomarkers on hepatology practice: Past,  
652 present and future. *J Hepatol* 2022;76:1362-1378.

- 653 7. Piazzolla VA, Mangia A. Noninvasive Diagnosis of NAFLD and NASH. *Cells* 2020;9.
- 654 8. European Association for the Study of the Liver. Electronic address eee, Clinical Practice  
655 Guideline P, Chair, representative EGB, Panel m. EASL Clinical Practice Guidelines on non-invasive tests  
656 for evaluation of liver disease severity and prognosis - 2021 update. *J Hepatol* 2021;75:659-689.
- 657 9. Robinson MD, McCarthy DJ, Smyth GK. edgeR: a Bioconductor package for differential expression  
658 analysis of digital gene expression data. *Bioinformatics* 2010;26:139-140.
- 659 10. Love MI, Huber W, Anders S. Moderated estimation of fold change and dispersion for RNA-seq  
660 data with DESeq2. *Genome Biol* 2014;15:550.
- 661 11. Trapnell C, Roberts A, Goff L, Pertea G, Kim D, Kelley DR, Pimentel H, et al. Differential gene and  
662 transcript expression analysis of RNA-seq experiments with TopHat and Cufflinks. *Nat Protoc*  
663 2012;7:562-578.
- 664 12. Costa-Silva J, Domingues DS, Menotti D, Hungria M, Lopes FM. Temporal progress of gene  
665 expression analysis with RNA-Seq data: A review on the relationship between computational methods.  
666 *Comput Struct Biotechnol J* 2023;21:86-98.
- 667 13. Barreby E, Chen P, Aouadi M. Macrophage functional diversity in NAFLD - more than  
668 inflammation. *Nat Rev Endocrinol* 2022;18:461-472.
- 669 14. Wang ZY, Keogh A, Waldt A, Cuttat R, Neri M, Zhu S, Schuierer S, et al. Single-cell and bulk  
670 transcriptomics of the liver reveals potential targets of NASH with fibrosis. *Sci Rep* 2021;11:19396.
- 671 15. Guillems M, Bonnardel J, Haest B, Vanderborcht B, Wagner C, Remmerie A, Bujko A, et al. Spatial  
672 proteogenomics reveals distinct and evolutionarily conserved hepatic macrophage niches. *Cell*  
673 2022;185:379-396 e338.
- 674 16. Green CD, Dozmorov MG, Spiegel S. Analysis of Liver Responses to Non-alcoholic Steatohepatitis  
675 by mRNA-Sequencing. *Methods Mol Biol* 2022;2455:163-179.
- 676 17. Stark R, Grzelak M, Hadfield J. RNA sequencing: the teenage years. *Nat Rev Genet*  
677 2019;20:631-656.
- 678 18. Brosch M, Kattler K, Herrmann A, von Schonfels W, Nordstrom K, Seehofer D, Damm G, et al.  
679 Epigenomic map of human liver reveals principles of zonated morphogenic and metabolic control. *Nat*  
680 *Commun* 2018;9:4150.
- 681 19. Mardinoglu A, Wu H, Bjornson E, Zhang C, Hakkarainen A, Rasanen SM, Lee S, et al. An Integrated  
682 Understanding of the Rapid Metabolic Benefits of a Carbohydrate-Restricted Diet on Hepatic Steatosis  
683 in Humans. *Cell Metab* 2018;27:559-571 e555.
- 684 20. Suppli MP, Rigbolt KTG, Veidal SS, Heeboll S, Eriksen PL, Demant M, Bagger JI, et al. Hepatic  
685 transcriptome signatures in patients with varying degrees of nonalcoholic fatty liver disease compared  
686 with healthy normal-weight individuals. *Am J Physiol Gastrointest Liver Physiol* 2019;316:G462-G472.
- 687 21. Hoang SA, Oseini A, Feaver RE, Cole BK, Asgharpour A, Vincent R, Siddiqui M, et al. Gene  
688 Expression Predicts Histological Severity and Reveals Distinct Molecular Profiles of Nonalcoholic Fatty  
689 Liver Disease. *Sci Rep* 2019;9:12541.
- 690 22. Govaere O, Cockell S, Tiniakos D, Queen R, Younes R, Vacca M, Alexander L, et al. Transcriptomic  
691 profiling across the nonalcoholic fatty liver disease spectrum reveals gene signatures for  
692 steatohepatitis and fibrosis. *Sci Transl Med* 2020;12.
- 693 23. Pfister D, Nunez NG, Pinyol R, Govaere O, Pinter M, Szydłowska M, Gupta R, et al. NASH limits  
694 anti-tumour surveillance in immunotherapy-treated HCC. *Nature* 2021;592:450-456.
- 695 24. Pantano L, Agyapong G, Shen Y, Zhuo Z, Fernandez-Albert F, Rust W, Knebel D, et al. Molecular  
696 characterization and cell type composition deconvolution of fibrosis in NAFLD. *Sci Rep* 2021;11:18045.

- 697 25. Kozumi K, Kodama T, Murai H, Sakane S, Govaere O, Cockell S, Motooka D, et al. Transcriptomics  
698 Identify Thrombospondin-2 as a Biomarker for NASH and Advanced Liver Fibrosis. *Hepatology*  
699 2021;74:2452-2466.
- 700 26. van den Berg RA, Hoefsloot HC, Westerhuis JA, Smilde AK, van der Werf MJ. Centering, scaling,  
701 and transformations: improving the biological information content of metabolomics data. *BMC*  
702 *Genomics* 2006;7:142.
- 703 27. Ritchie ME, Phipson B, Wu D, Hu Y, Law CW, Shi W, Smyth GK. limma powers differential  
704 expression analyses for RNA-sequencing and microarray studies. *Nucleic Acids Res* 2015;43:e47.
- 705 28. Hao Y, Hao S, Andersen-Nissen E, Mauck WM, 3rd, Zheng S, Butler A, Lee MJ, et al. Integrated  
706 analysis of multimodal single-cell data. *Cell* 2021;184:3573-3587 e3529.
- 707 29. Niu L, Geyer PE, Wewer Albrechtsen NJ, Gluud LL, Santos A, Doll S, Treit PV, et al. Plasma  
708 proteome profiling discovers novel proteins associated with non-alcoholic fatty liver disease. *Mol Syst*  
709 *Biol* 2019;15:e8793.
- 710 30. Schneider CA, Rasband WS, Eliceiri KW. NIH Image to ImageJ: 25 years of image analysis. *Nat*  
711 *Methods* 2012;9:671-675.
- 712 31. Shu J, Dolman GE, Duan J, Qiu G, Ilyas M. Statistical colour models: an automated digital image  
713 analysis method for quantification of histological biomarkers. *Biomed Eng Online* 2016;15:46.
- 714 32. Febbraio MA, Reibe S, Shalpour S, Ooi GJ, Watt MJ, Karin M. Preclinical Models for Studying  
715 NASH-Driven HCC: How Useful Are They? *Cell Metab* 2019;29:18-26.
- 716 33. Florentino RM, Fraunhoffer NA, Morita K, Takeishi K, Ostrowska A, Achreja A, Animasahun O, et  
717 al. Cellular Location of HNF4alpha is Linked With Terminal Liver Failure in Humans. *Hepatol Commun*  
718 2020;4:859-875.
- 719 34. Xu C, Markova M, Seebeck N, Loft A, Hornemann S, Gantert T, Kabisch S, et al. High-protein diet  
720 more effectively reduces hepatic fat than low-protein diet despite lower autophagy and FGF21 levels.  
721 *Liver Int* 2020;40:2982-2997.
- 722 35. Hou J, Zhang J, Cui P, Zhou Y, Liu C, Wu X, Ji Y, et al. TREM2 sustains macrophage-hepatocyte  
723 metabolic coordination in nonalcoholic fatty liver disease and sepsis. *J Clin Invest* 2021;131.
- 724 36. Yang W, Feng Y, Zhou J, Cheung OK, Cao J, Wang J, Tang W, et al. A selective HDAC8 inhibitor  
725 potentiates antitumor immunity and efficacy of immune checkpoint blockade in hepatocellular  
726 carcinoma. *Sci Transl Med* 2021;13.
- 727 37. Brunt EM, Janney CG, Di Bisceglie AM, Neuschwander-Tetri BA, Bacon BR. Nonalcoholic  
728 steatohepatitis: a proposal for grading and staging the histological lesions. *Am J Gastroenterol*  
729 1999;94:2467-2474.
- 730 38. Kleiner DE, Brunt EM, Van Natta M, Behling C, Contos MJ, Cummings OW, Ferrell LD, et al. Design  
731 and validation of a histological scoring system for nonalcoholic fatty liver disease. *Hepatology*  
732 2005;41:1313-1321.
- 733 39. Karlsson M, Sjostedt E, Oksvold P, Sivertsson A, Huang J, Alvez MB, Arif M, et al. Genome-wide  
734 annotation of protein-coding genes in pig. *BMC Biol* 2022;20:25.
- 735 40. Ouyang JF, Kamaraj US, Cao EY, Rackham OJL. ShinyCell: Simple and sharable visualisation of  
736 single-cell gene expression data. *Bioinformatics* 2021.
- 737 41. Liu Y, Ciotti GE, Eisinger-Mathason TSK. Hypoxia and the Tumor Secretome. *Adv Exp Med Biol*  
738 2019;1136:57-69.
- 739 42. Crescenzi E, Leonardi A, Pacifico F. NGAL as a Potential Target in Tumor Microenvironment. *Int J*  
740 *Mol Sci* 2021;22.

- 741 43. Zhou X, Zhang J, Lv W, Zhao C, Xia Y, Wu Y, Zhang Q. The pleiotropic roles of adipocyte secretome  
742 in remodeling breast cancer. *J Exp Clin Cancer Res* 2022;41:203.
- 743 44. Uhlen M, Karlsson MJ, Hober A, Svensson AS, Scheffel J, Kotol D, Zhong W, et al. The human  
744 secretome. *Sci Signal* 2019;12.
- 745 45. Corey KE, Pitts R, Lai M, Loureiro J, Masia R, Osganian SA, Gustafson JL, et al. ADAMTSL2 protein  
746 and a soluble biomarker signature identify at-risk non-alcoholic steatohepatitis and fibrosis in adults  
747 with NAFLD. *J Hepatol* 2022;76:25-33.
- 748 46. Gerhard GS, Hanson A, Wilhelmsen D, Piras IS, Still CD, Chu X, Petrick AT, et al. AEBP1 expression  
749 increases with severity of fibrosis in NASH and is regulated by glucose, palmitate, and miR-372-3p.  
750 *PLoS One* 2019;14:e0219764.
- 751 47. Cengiz M, Yilmaz G, Ozenirler S. Serum Biglycan as a Diagnostic Marker for Non-Alcoholic  
752 Steatohepatitis and Liver Fibrosis. *Clin Lab* 2021;67.
- 753 48. Stupnikov A, McInerney CE, Savage KI, McIntosh SA, Emmert-Streib F, Kennedy R, Salto-Tellez M,  
754 et al. Robustness of differential gene expression analysis of RNA-seq. *Comput Struct Biotechnol J*  
755 2021;19:3470-3481.
- 756 49. Shakola F, Palejev D, Ivanov I. A Framework for Comparison and Assessment of Synthetic  
757 RNA-Seq Data. *Genes (Basel)* 2022;13.
- 758 50. Tapper EB, Loomba R. Noninvasive imaging biomarker assessment of liver fibrosis by  
759 elastography in NAFLD. *Nat Rev Gastroenterol Hepatol* 2018;15:274-282.
- 760 51. Masoodi M, Gastaldelli A, Hyotylainen T, Arretxe E, Alonso C, Gaggini M, Brosnan J, et al.  
761 Metabolomics and lipidomics in NAFLD: biomarkers and non-invasive diagnostic tests. *Nat Rev*  
762 *Gastroenterol Hepatol* 2021;18:835-856.
- 763 52. Wong VW, Adams LA, de Ledinghen V, Wong GL, Sookoian S. Noninvasive biomarkers in NAFLD  
764 and NASH - current progress and future promise. *Nat Rev Gastroenterol Hepatol* 2018;15:461-478.
- 765 53. Panera N, Gnani D, Crudele A, Ceccarelli S, Nobili V, Alisi A. MicroRNAs as controlled systems and  
766 controllers in non-alcoholic fatty liver disease. *World J Gastroenterol* 2014;20:15079-15086.
- 767 54. Fang Z, Dou G, Wang L. MicroRNAs in the Pathogenesis of Nonalcoholic Fatty Liver Disease. *Int J*  
768 *Biol Sci* 2021;17:1851-1863.
- 769 55. Qian X, Zong W, Ma L, Yang Z, Chen W, Yan J, Xu J. MM-associated circular RNA downregulates  
770 microRNA-19a through methylation to suppress proliferation of pancreatic adenocarcinoma cells.  
771 *Bioengineered* 2022;13:9294-9300.
- 772 56. Jampoka K, Muangpaisarn P, Khongnomnan K, Treeprasertsuk S, Tangkijvanich P, Payungporn S.  
773 Serum miR-29a and miR-122 as Potential Biomarkers for Non-Alcoholic Fatty Liver Disease (NAFLD).  
774 *Microna* 2018;7:215-222.
- 775 57. Akuta N, Kawamura Y, Suzuki F, Saitoh S, Arase Y, Fujiyama S, Sezaki H, et al. Analysis of  
776 association between circulating miR-122 and histopathological features of nonalcoholic fatty liver  
777 disease in patients free of hepatocellular carcinoma. *BMC Gastroenterol* 2016;16:141.
- 778 58. Wang W, Min L, Qiu X, Wu X, Liu C, Ma J, Zhang D, et al. Biological Function of Long Non-coding  
779 RNA (LncRNA) Xist. *Front Cell Dev Biol* 2021;9:645647.
- 780 59. Atanasovska B, Rensen SS, Marsman G, Shiri-Sverdlov R, Withoff S, Kuipers F, Wijmenga C, et al.  
781 Long Non-Coding RNAs Involved in Progression of Non-Alcoholic Fatty Liver Disease to Steatohepatitis.  
782 *Cells* 2021;10.
- 783 60. Chee D, Ng CH, Chan KE, Huang DQ, Teng M, Muthiah M. The Past, Present, and Future of  
784 Noninvasive Test in Chronic Liver Diseases. *Med Clin North Am* 2023;107:397-421.

- 785 61. Bozaoglu K, Attard C, Kulkarni H, Cummings N, Diego VP, Carless MA, Shields KA, et al. Plasma  
786 levels of soluble interleukin 1 receptor accessory protein are reduced in obesity. *J Clin Endocrinol*  
787 *Metab* 2014;99:3435-3443.
- 788 62. Gao R, Wang J, He X, Wang T, Zhou L, Ren Z, Yang J, et al. Comprehensive analysis of endoplasmic  
789 reticulum-related and secretome gene expression profiles in the progression of non-alcoholic fatty  
790 liver disease. *Front Endocrinol (Lausanne)* 2022;13:967016.
- 791 63. Reznik N, Fass D. Disulfide bond formation and redox regulation in the Golgi apparatus. *FEBS Lett*  
792 2022;596:2859-2872.
- 793 64. Ledesma D, Symes S, Richards S. Advancements within Modern Machine Learning Methodology:  
794 Impacts and Prospects in Biomarker Discovery. *Curr Med Chem* 2021;28:6512-6531.
- 795 65. Newman AM, Steen CB, Liu CL, Gentles AJ, Chaudhuri AA, Scherer F, Khodadoust MS, et al.  
796 Determining cell type abundance and expression from bulk tissues with digital cytometry. *Nat*  
797 *Biotechnol* 2019;37:773-782.
- 798

799 **Figure Legend**

800

801 **Figure 1. RNA sequencing data processing, integration, and analysis**

802 A. Illustration of data processing.

803 B. Principal component analysis (PCA) based on the origin of datasets.

804 C. PCA based on normalized RNA abundance (nCount).

805 D. PCA based on NAS score.

806 E. PCA based on fibrosis scores.

807

808

809 **Figure 2. Integrative transcriptome and proteomics analysis to identify NAFLD**  
810 **biomarkers**

811 A. Heatmap presentation of 1021 up-regulated genes in cluster 4 associated with  
812 increasing NAS scores.

813 B. Heatmap presentation of 643 down-regulated genes in cluster 14 associated with  
814 increasing NAS scores.

815 C. Protein cluster of 148 up-regulated proteins associated with increasing NAFLD  
816 severity in PXD011839.

817 D. Protein cluster of 114 down-regulated proteins associated with increasing NAFLD  
818 severity in PXD011839.

819 E. (UP) Venn diagram showing 16 overlapping genes between up-regulated genes  
820 identified by RNA-seq, up-regulated proteins in the plasma, and secreting proteins.

821 (DOWN) Venn diagram showing 22 overlapping genes between down-regulated  
822 genes identified by RNA-seq, down-regulated proteins in the plasma, and secreting  
823 proteins.

824

825 **Figure 3. Relationship between QSOX1/IL1RAP and NAS/fibrosis scores in**  
826 **integrative RNA-seq data of the human liver.**

827 A. Box plot of QSOX1 gene expressions grouped by NAS scores (N0, N1-4, N5-8).

828 B. Box plot of QSOX1 gene expressions grouped by fibrosis stages (F0, F1-2, F3-4).

829 C. Box plot of IL1RAP gene expressions grouped by NAS scores (N0, N1-4, N5-8).

830 D. Box plot of IL1RAP gene expressions grouped by fibrosis stages (F0, F1-2, F3-4).

831 E. Box plot of QSOX1/IL1RAP gene expression ratio grouped by NAS scores (N0, N1-4,  
832 N5-8).

833 F. Box plot of QSOX1/ IL1RAP gene expression ratio grouped by fibrosis stages (F0,  
834 F1-2, F3-4).

835 Statistical testing was performed using the Wilcoxon rank sum test, with p-values  
836 shown in the plot.

837

838 **Figure 4. Comparison of plasma protein QSOX1/IL1RAP between healthy**  
839 **individuals and NAFLD at various stages.**

840 A-B. Box plots of plasma QSOX1 (A) and IL1RAP (B) protein levels in healthy  
841 individuals, NAFLD patients, and cirrhosis patients quantified by mass spectrometry  
842 in the NAFLD proteomics cohort.

843 C. Box plots of plasma QSOX1 and IL1RAP protein ratios in healthy controls, NAFLD  
 844 patients, and cirrhosis patients quantified by mass spectrometry in the NAFLD  
 845 proteomics cohort.  
 846 D-E. Box plots of plasma QSOX1 (D) and IL1RAP (E) protein levels in healthy controls  
 847 and NAFLD groups (pg/ml) measured by ELISA.  
 848 F. Box plot of plasma QSOX1 and IL1RAP protein ratio.  
 849 Statistical testing was performed using the Wilcoxon rank sum test, with p-values  
 850 shown in the plot.

851  
 852 **Figure 5. Quantification of liver QSOX1 and IL1RAP levels in NAFLD patients by IHC.**

853 A. Representative IHC images of QSOX1 and IL1RAP in liver biopsies from mild NAFLD  
 854 patients (N0-4, F0-2) and severe NAFLD patients (N5-8, F3-4).  
 855 B. The integrated density of QSOX1 IHC. Box plots showing the log10 value.  
 856 C. The integrated density of IL1RAP IHC. Box plots showing the log10 value.  
 857 D. Box plot of QSOX1 and IL1RAP ratio of the integrated density quantified with IHC.  
 858 Statistical testing was performed using t-test, with p-values shown in the plot.

859

860 **Table 1**

| <b>Table 1: Characteristics of the populations studied</b>                                                                                                                                     |                   |                  |                 |                |            |             |             |
|------------------------------------------------------------------------------------------------------------------------------------------------------------------------------------------------|-------------------|------------------|-----------------|----------------|------------|-------------|-------------|
| A total of 625 human liver samples of the full histological range from normal, NAFL, NASH to cirrhosis with the NAS (N) and fibrosis (F) scores provided in the database or original articles. |                   |                  |                 |                |            |             |             |
| Sample distribution of NAS and FIB                                                                                                                                                             | F0                | F1               | F2              | F3             | F4         | Age (yrs)   | BMI (kg/m2) |
|                                                                                                                                                                                                |                   |                  |                 |                |            | mean ± S.D. | mean ± S.D. |
| N0 (n)                                                                                                                                                                                         | 81                | 1                | 1               | -              | 1          | 46.4 ± 10.0 | 35.4 ± 9.1  |
| N1 (n)                                                                                                                                                                                         | 29                | 9                | 1               | -              | 1          | 42.8 ± 12.7 | 36.1 ± 6.6  |
| N2 (n)                                                                                                                                                                                         | 27                | 10               | 1               | -              | 1          | 51.9 ± 5.8  | 35.1 ± 6.0  |
| N3 (n)                                                                                                                                                                                         | 46                | 72               | 9               | 5              | 3          | 49.8 ± 9.4  | 34.6 ± 8.9  |
| N4 (n)                                                                                                                                                                                         | 30                | 19               | 20              | 15             | 3          | 49.6 ± 9.5  | 33.9 ± 4.6  |
| N5 (n)                                                                                                                                                                                         | 7                 | 41               | 75              | 20             | 5          | 52.4 ± 11.7 | 32.5 ± 5.5  |
| N6 (n)                                                                                                                                                                                         | 1                 | 18               | 17              | 18             | 3          | 53.2 ± 8.5  | 34.5 ± 5.6  |
| N7 (n)                                                                                                                                                                                         | -                 | 1                | 14              | 11             | 1          | 49.4 ± 9.8  | 36.3 ± 7.2  |
| N8 (n)                                                                                                                                                                                         | -                 | -                | 2               | 4              | 2          | 54 ± 0.0    | 31.3 ± 0.0  |
| Age (yrs) mean ± S.D.                                                                                                                                                                          | 46.6 ± 9.6        | 49.0 ± 10.6      | 53.2 ± 11.3     | 54.7 ± 6.0     | 54.8 ± 5.4 |             |             |
| BMI(kg/m2) mean ± S.D.                                                                                                                                                                         | 37.1 ± 8.3        | 32.4 ± 5.6       | 33.1 ± 7.0      | 32.5 ± 2.9     | 32.6 ± 2.2 |             |             |
| Gender n(male/female)                                                                                                                                                                          | 221(105/116)<br>* | 171<br>(108/63)* | 140<br>(64/76)* | 73<br>(35/38)* | 20 (11/9)* |             |             |

**Table 1.** \*The ratio of gender was estimated according to the gender ratio in the original articles. BMI, body mass index; N, NAS score; F, Fibrosis score.

861

862

863

864

865

866

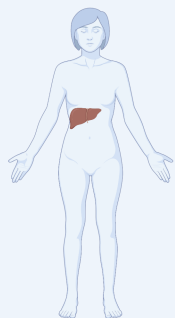

Healthy control

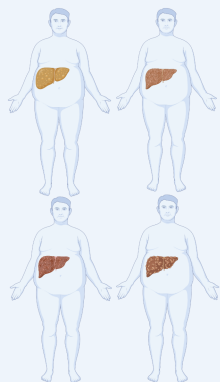

NAFLD spectrum

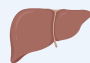

Liver biopsy

625 samples (81 healthy and 544 NAFLD)

12 samples (6 mild and 6 severe NAFLD)

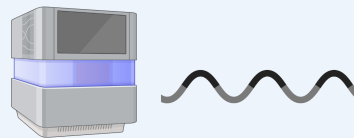

RNA sequencing

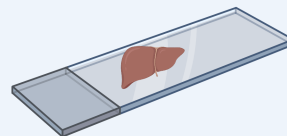

IHC

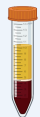

Plasma

40 samples (10 healthy, 20 NAFLD and 10 cirrhosis)

42 samples (14 healthy and 28 NAFLD)

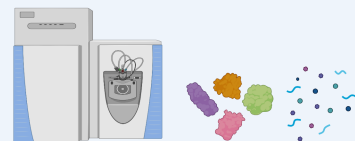

Mass spectrometry

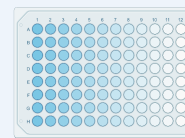

ELISA

## Biomarkers

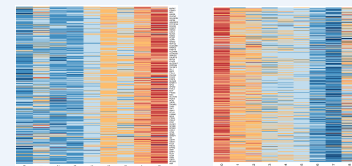

Candidate clusters

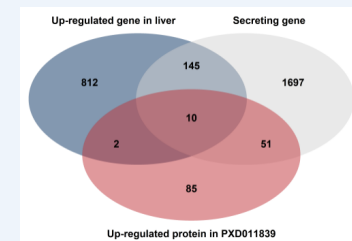

Cross analysis

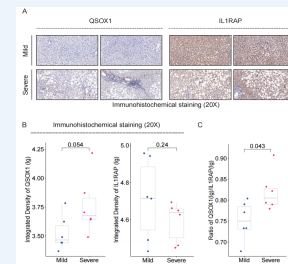

Biomarker validation



**Figure 1**

medRxiv preprint doi: <https://doi.org/10.1101/2023.07.26.23293038>; this version posted May 1, 2024. The copyright holder for this preprint (which was not certified by peer review) is the author/funder, who has granted medRxiv a license to display the preprint in perpetuity. All rights reserved. No reuse allowed without permission.

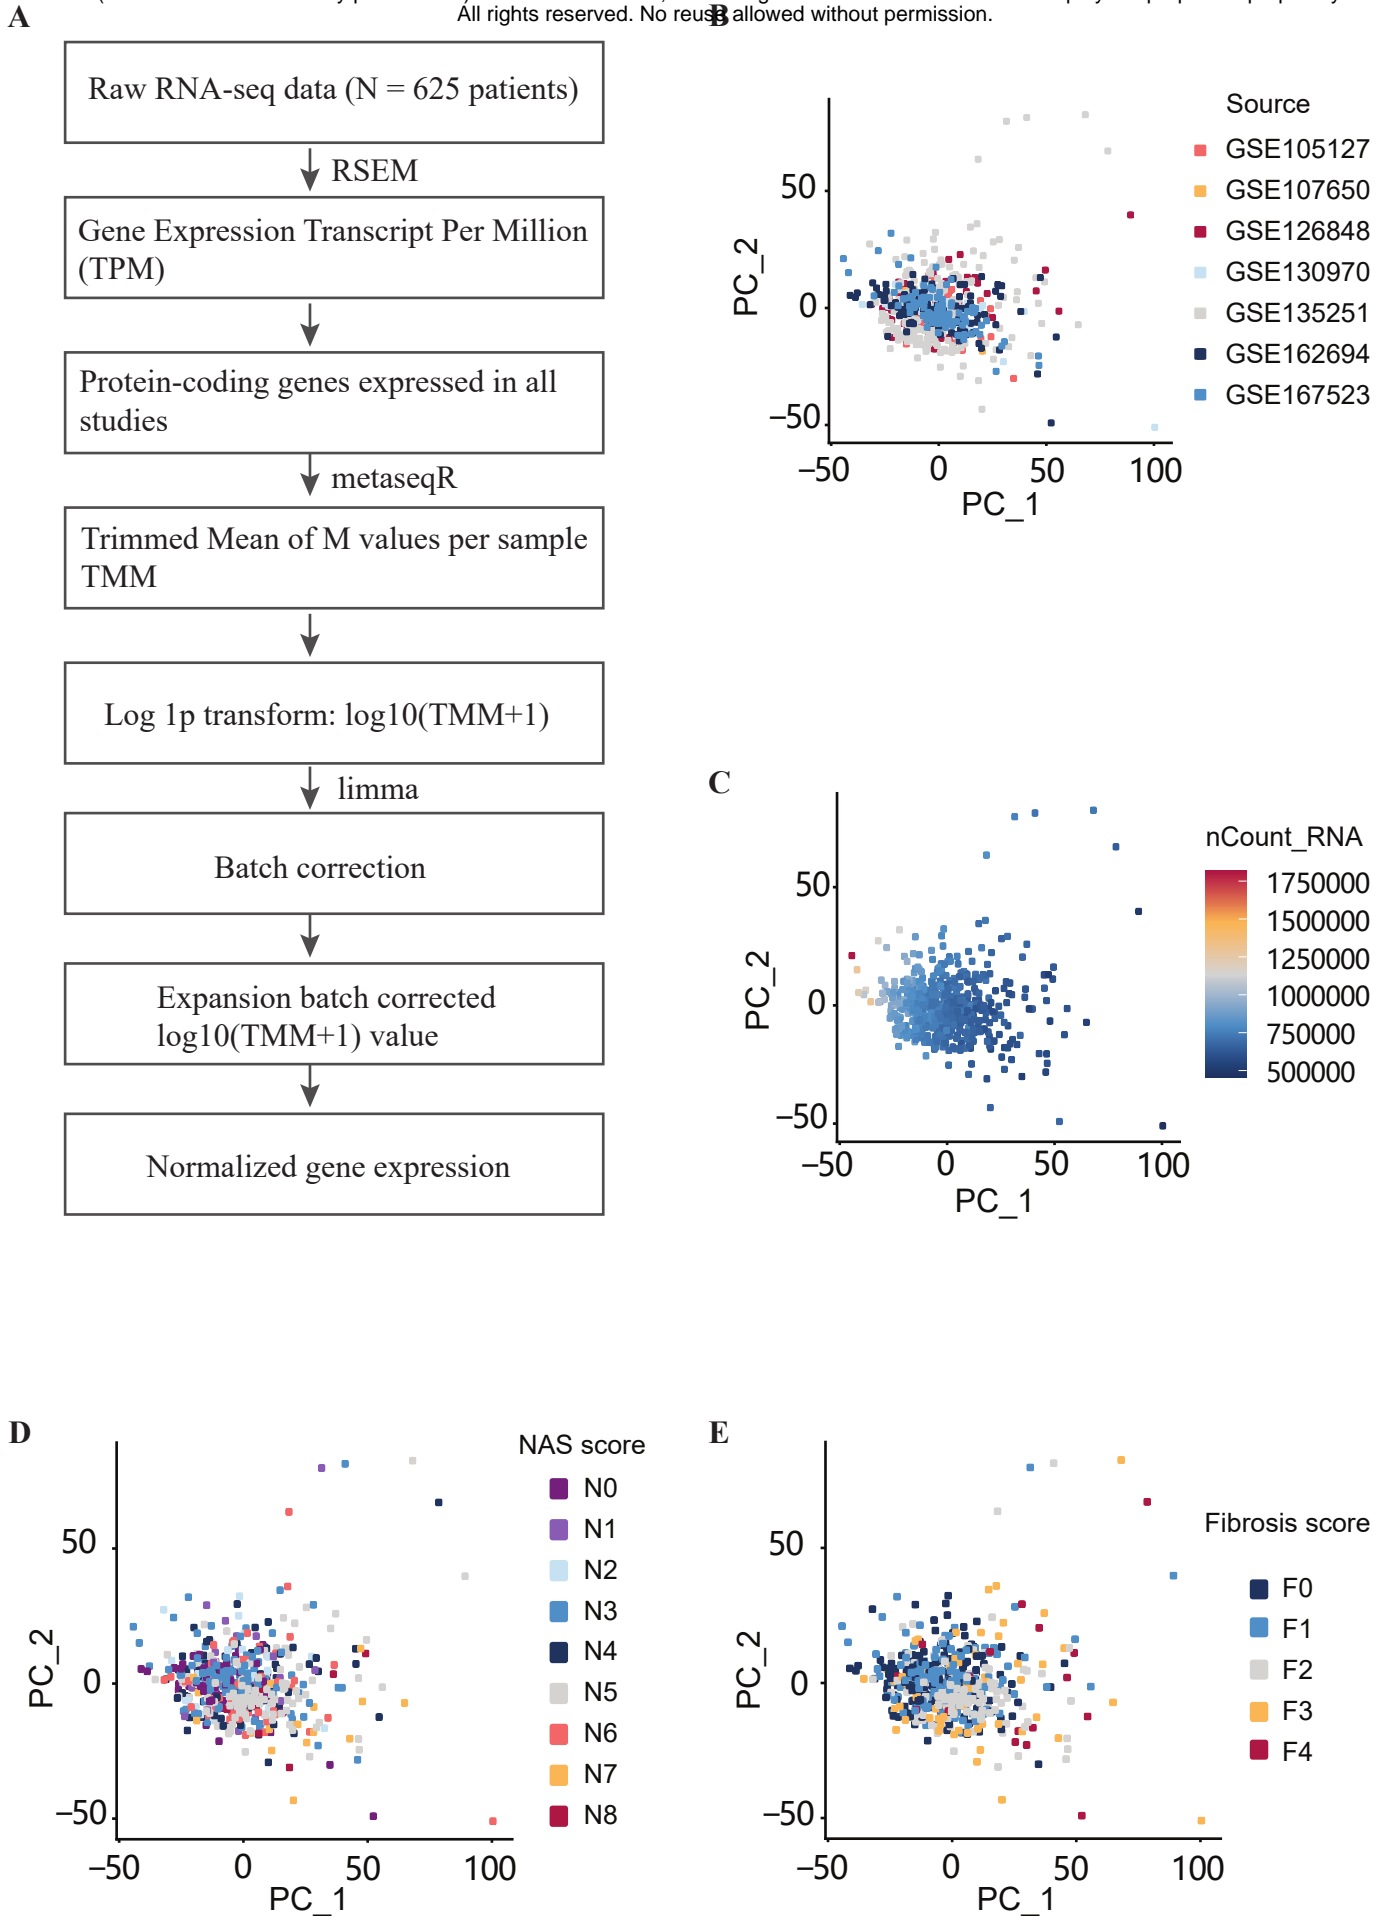

**Figure 2**

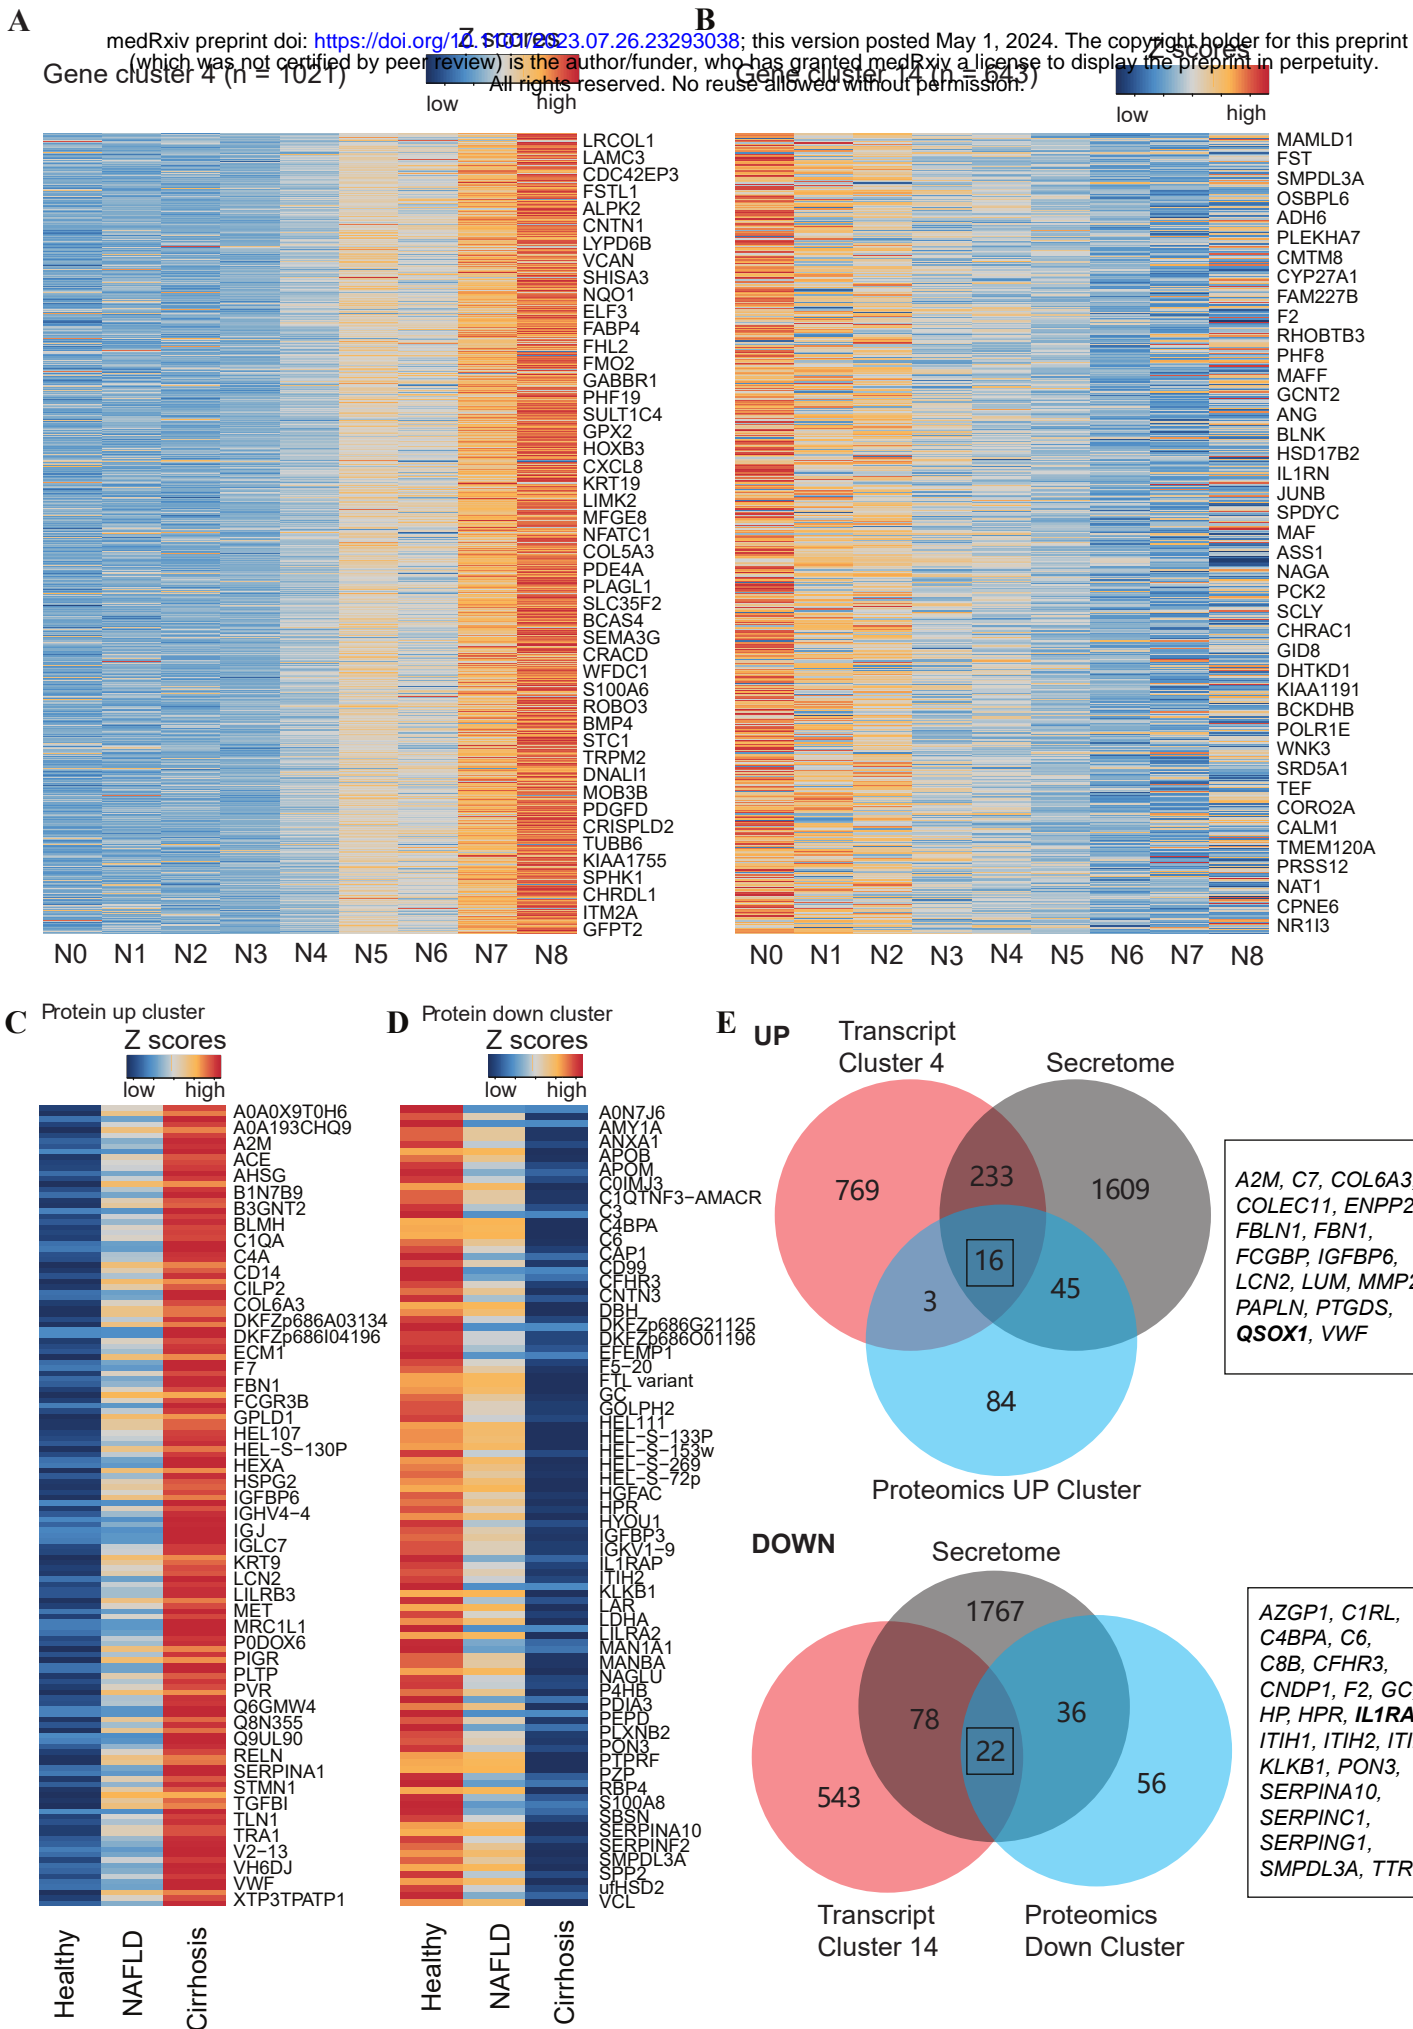

**Figure 3**

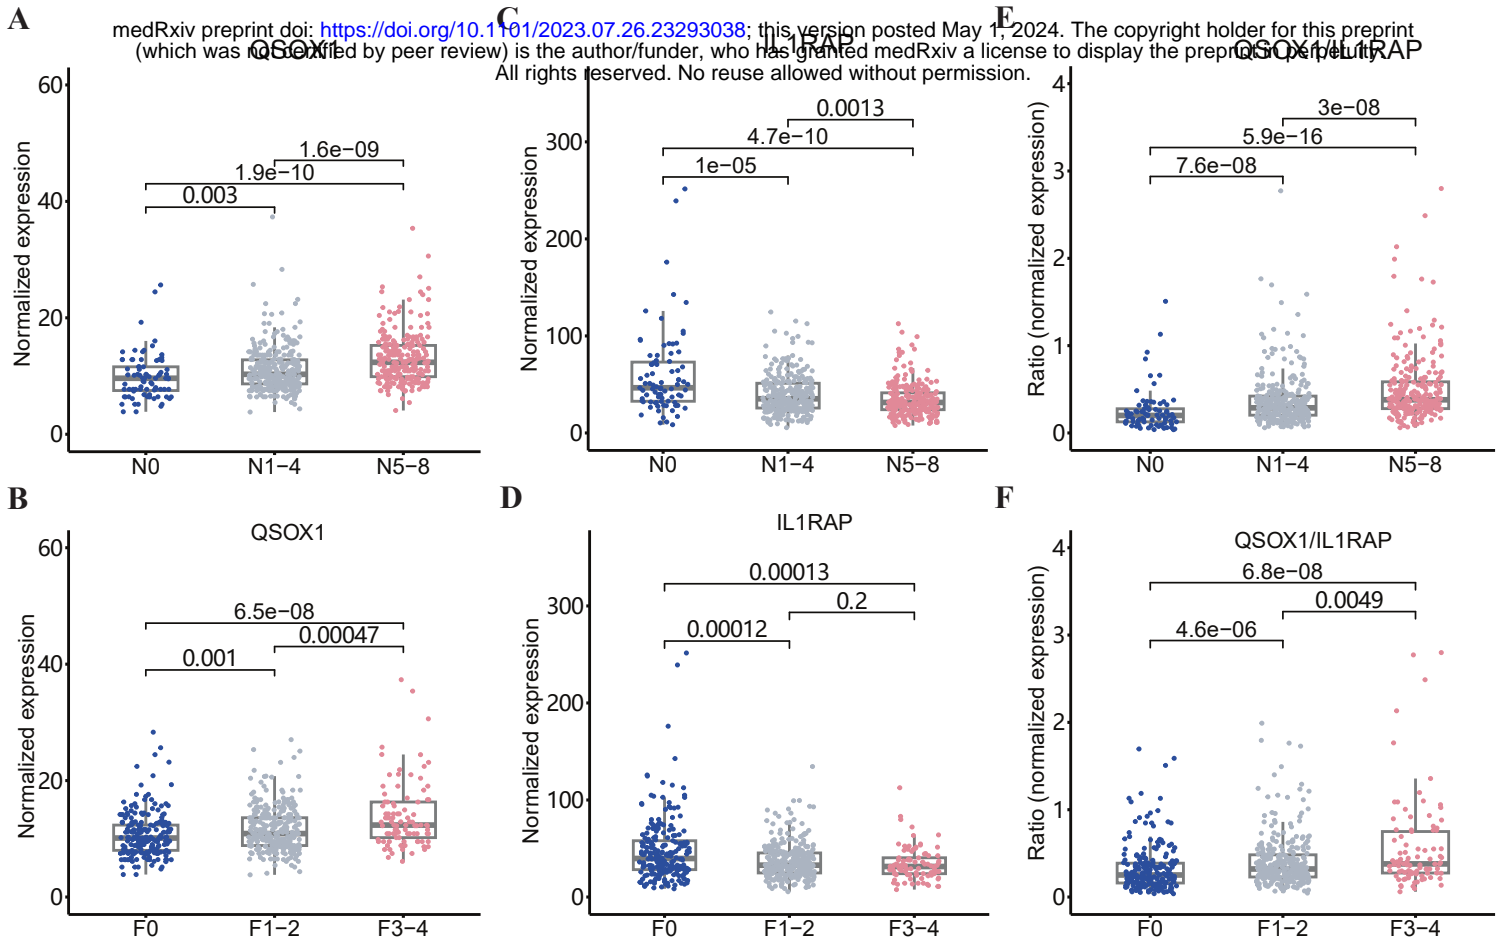

**Figure 4**

medRxiv preprint doi: <https://doi.org/10.1101/2023.07.26.23293038>; this version posted May 1, 2024. The copyright holder for this preprint (which was not certified by peer review) is the author/funder, who has granted medRxiv a license to display the preprint in perpetuity. All rights reserved. No reuse allowed without permission.

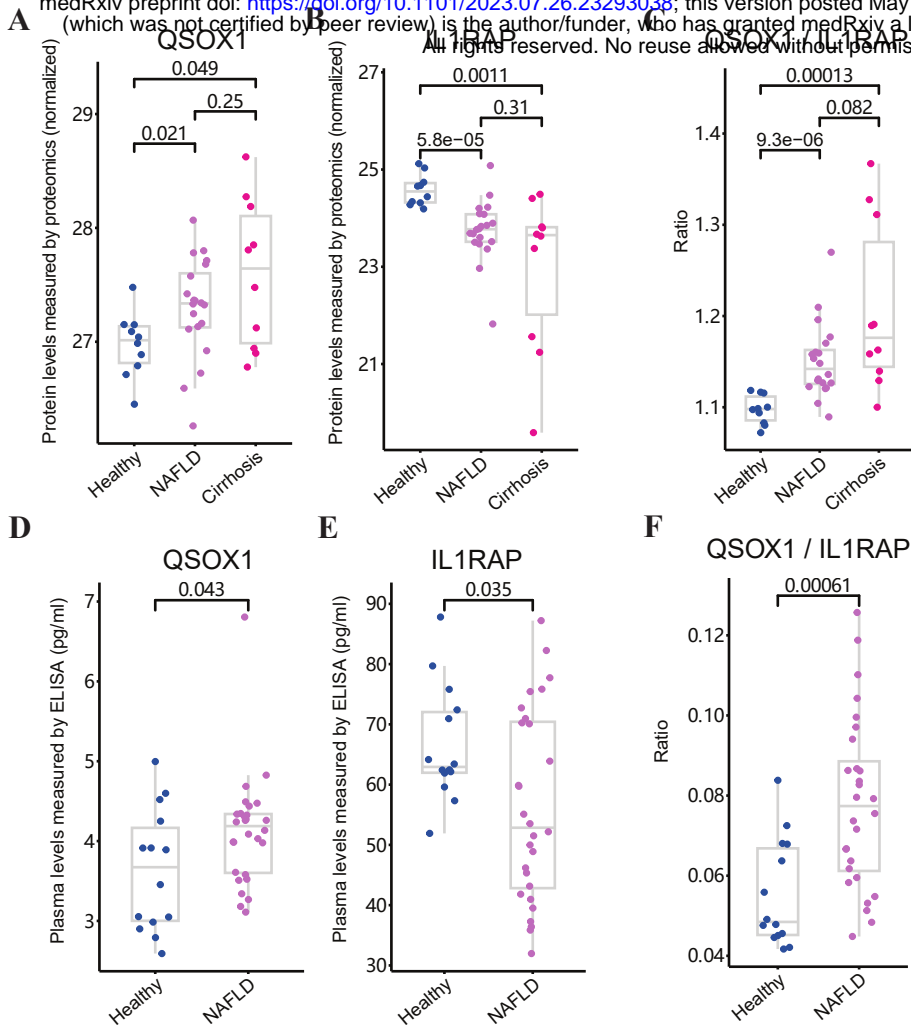

**Figure 5**

**A** medRxiv preprint doi: <https://doi.org/10.1101/2023.07.26.23293038>; this version posted May 1, 2024. The copyright holder for this preprint (which was not certified by peer review) is the author/funder, who has granted medRxiv a license to display the preprint in perpetuity. All rights reserved. No reuse allowed without permission.

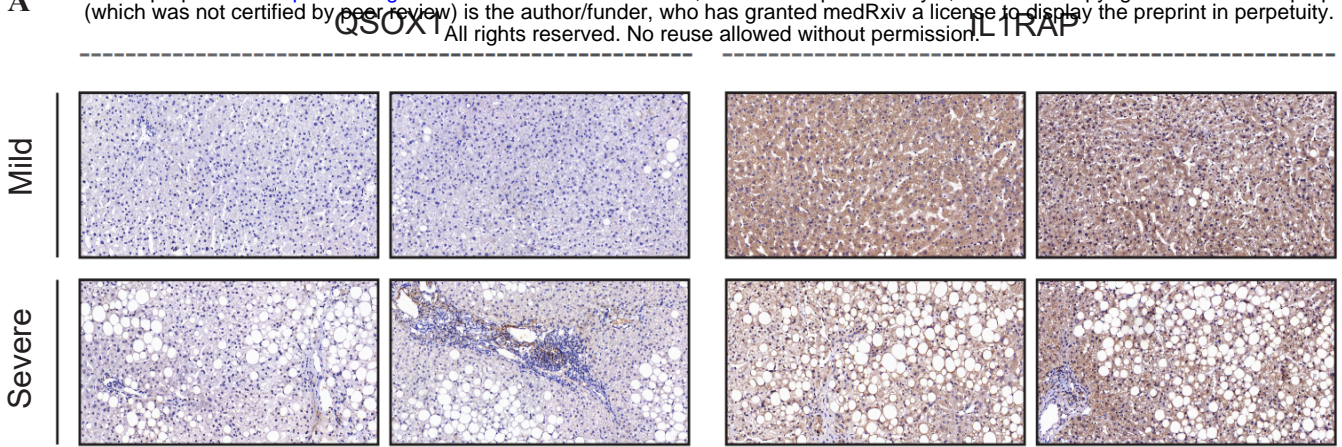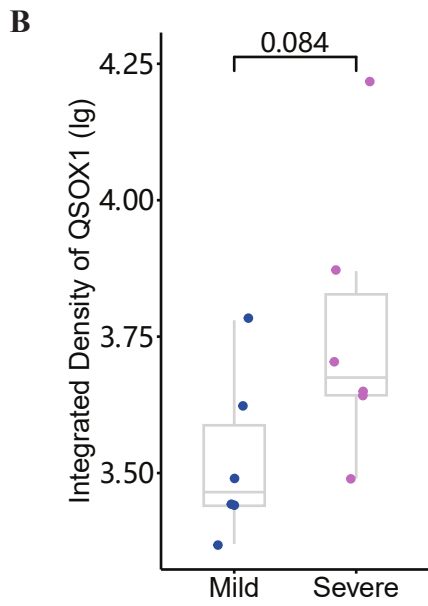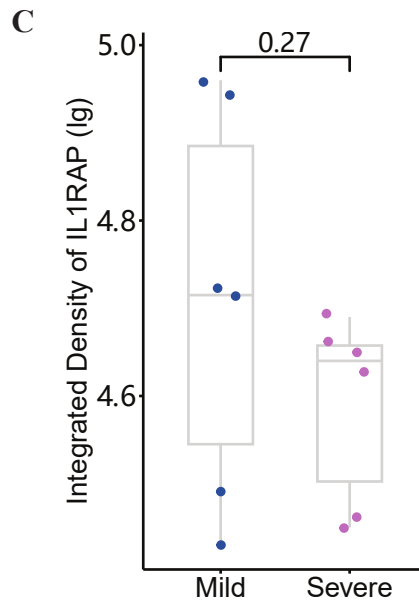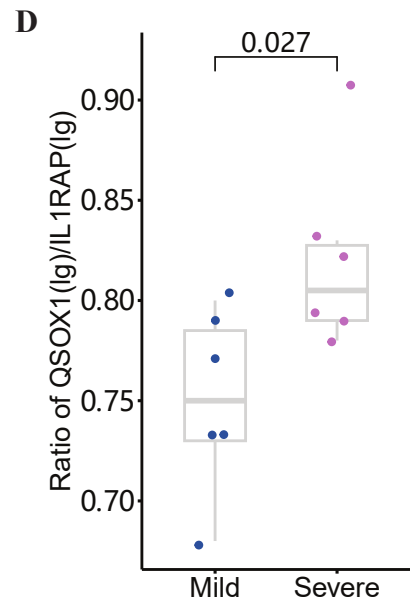

## Supplementary File

### **A gene-based clustering approach reveals QSOX1/IL1RAP as promising biomarkers for the severity of non-alcoholic fatty liver disease**

Wenfeng Ma 1,2,3,4, Jinrong Huang 2, Benqiang Cai 1,4, Mumin Shao 6,7, Xuewen Yu 6,7, Mikkel Breinholt Kjær 5,8, Minling Lv 1,4, Xin Zhong 1,4, Shaomin Xu 1,4, Bolin Zhan 1,4, Qun Li 1,4, Qi Huang 1,4, Mengqing Ma 1,4, Lei Cheng 2, Yonglun Luo 2,3\*, Henning Grønbaek 5\*, Xiaozhou Zhou 1,4\*, Lin Lin 2,3\*

1 Department of Liver Disease, Shenzhen Traditional Chinese Medicine Hospital, Shenzhen, Guangdong 518033, China.

2 Department of Biomedicine, Aarhus University, Aarhus, Denmark.

3 Steno Diabetes Center Aarhus, Aarhus University Hospital, Aarhus, Denmark.

4 Department of Liver Disease, The Fourth Clinical Medical College of Guangzhou University of Chinese Medicine, Shenzhen, 518033, China.

5 Department of Hepatology and Gastroenterology, Aarhus University Hospital, Aarhus, Denmark.

6 Department of Pathology, Shenzhen Traditional Chinese Medicine Hospital, Shenzhen, Guangdong 518033, China.

7 Department of Pathology, The Fourth Clinical Medical College of Guangzhou University of Chinese Medicine, Shenzhen, 518033, China.

8 Department of Clinical Medicine, Aarhus University, Aarhus, Denmark.

\* = corresponding author

**This supplementary file contains: Supplementary Figure S1-S5**

### Supplementary Figure S1

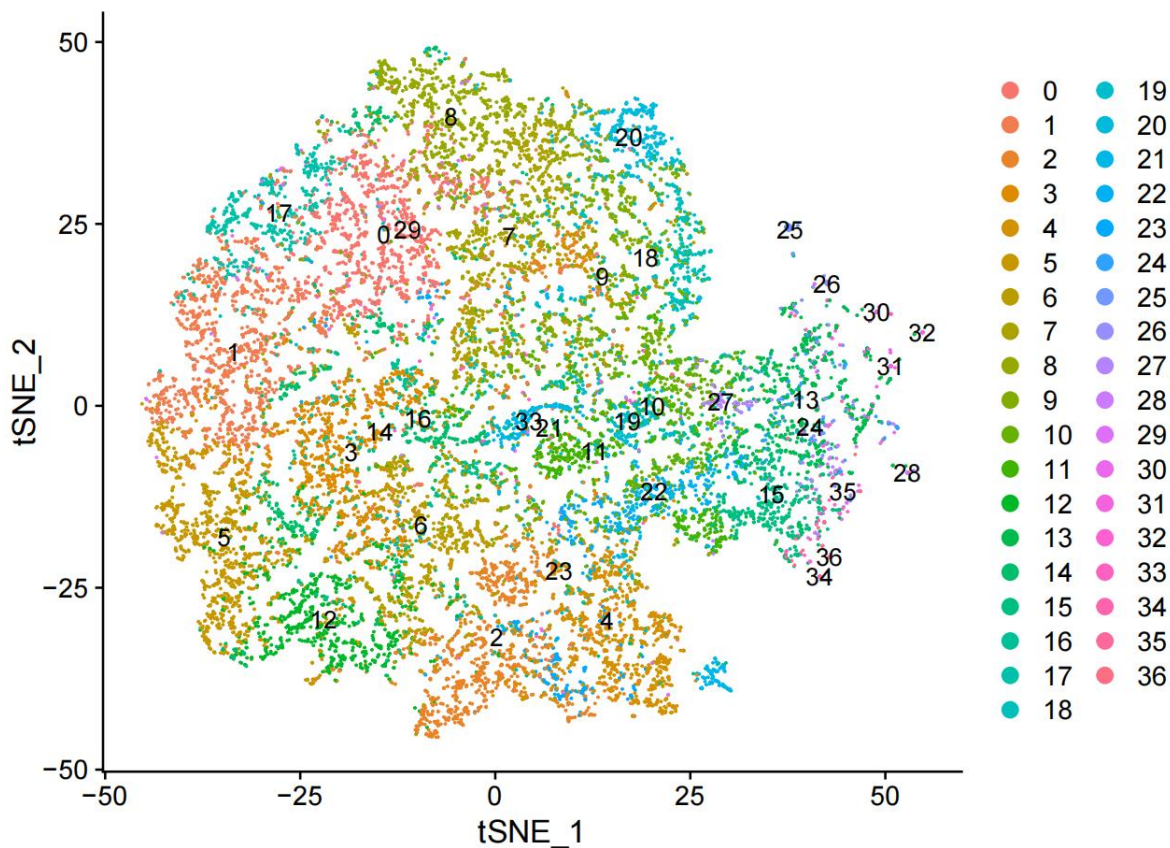

### Supplementary Figure S1. t-SNE visualization of gene clusters

Visualization of gene expression profiling clusters across NAFLD progression with the t-distributed stochastic neighbor embedding (t-SNE) statistical method. Each dot represents one protein coding gene (n = 17,946). A graph-based clustering approach was used. The dimensions of reduction were set to 1:20 and visualized with a resolution of 2.3.

**Supplementary Figure S2**

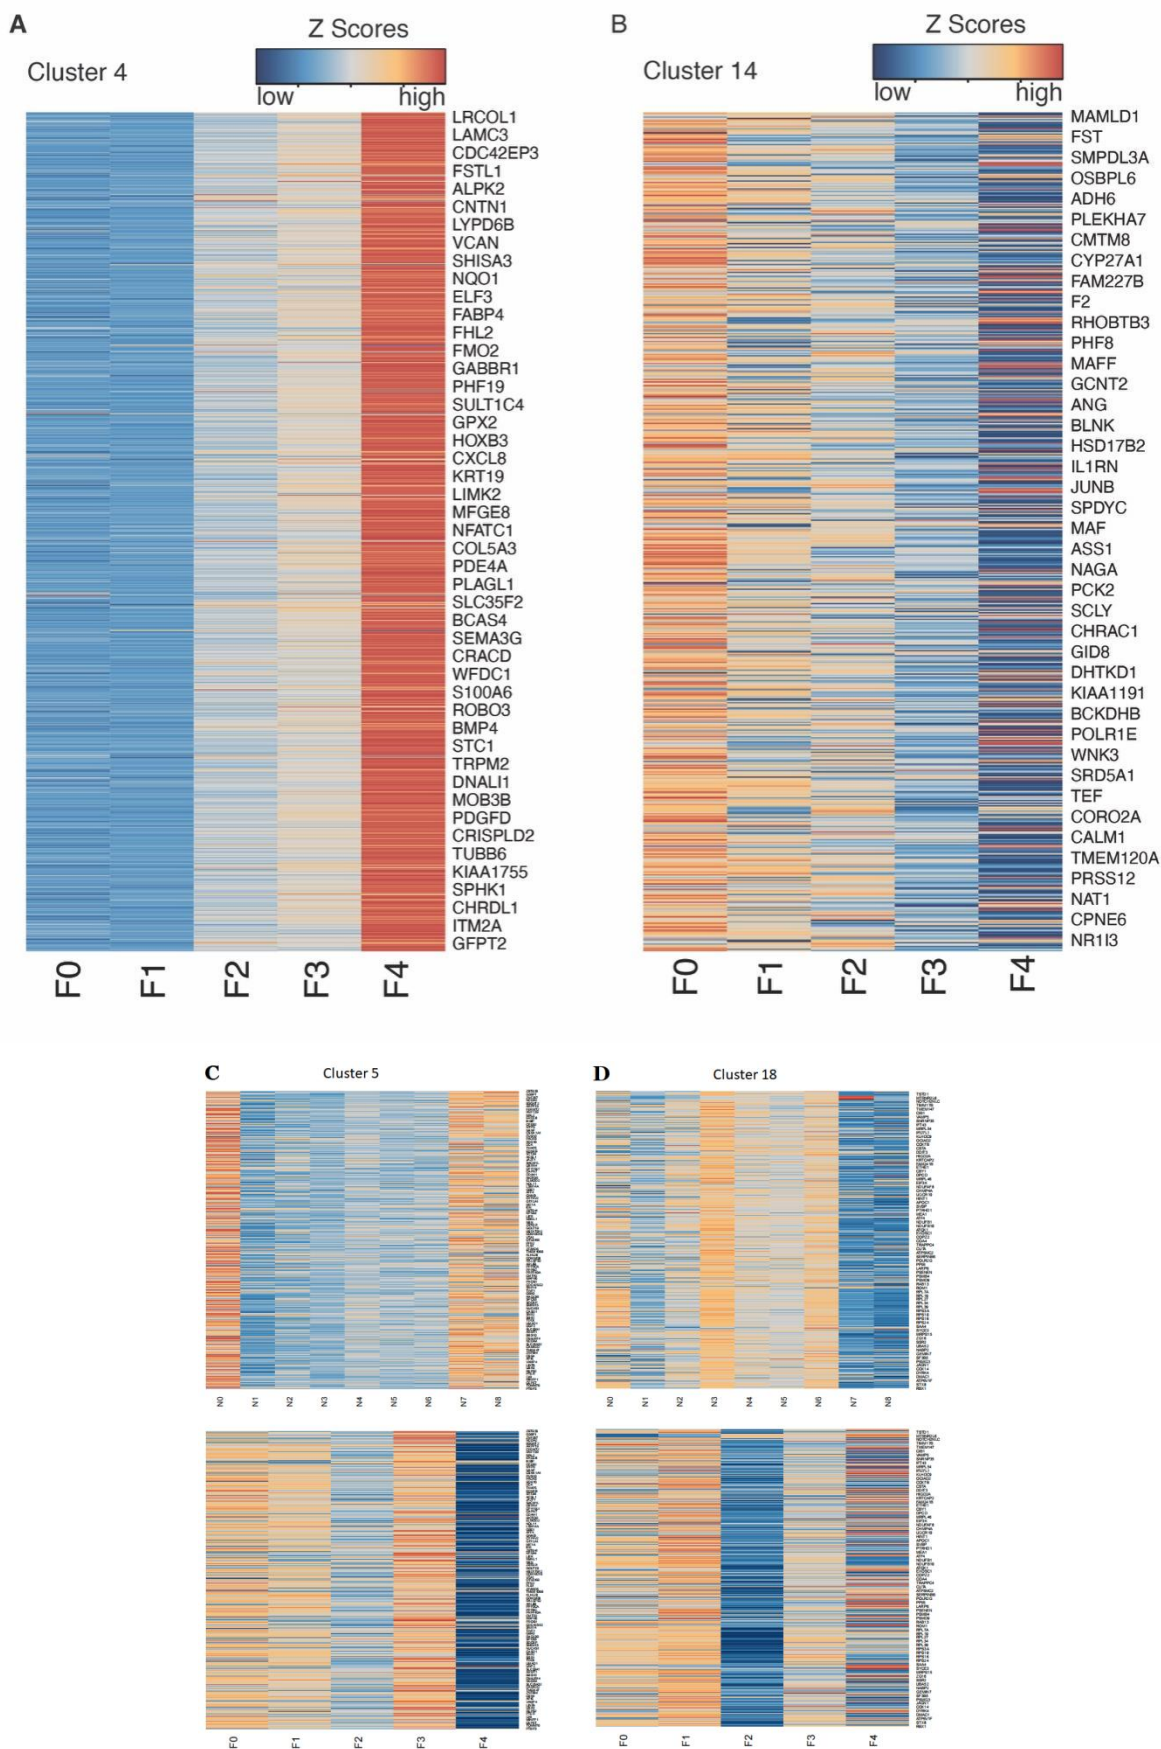



## **Supplementary Figure S2 Heatmap presentation of gene expression profile along NAFLD**

### **progression.**

A. Heatmap presentation of 1021 up-regulated genes in cluster 4 associated with increasing fibrosis scores.

B. Heatmap presentation of 643 down-regulated genes in cluster 14 associated with increasing fibrosis scores.

C and D. Contrary to genes in cluster 4 and 14, C and D displayed gene clusters with chaotic gene expression patterns associated with both NAS scores and fibrosis scores.

### Supplementary Figure S3

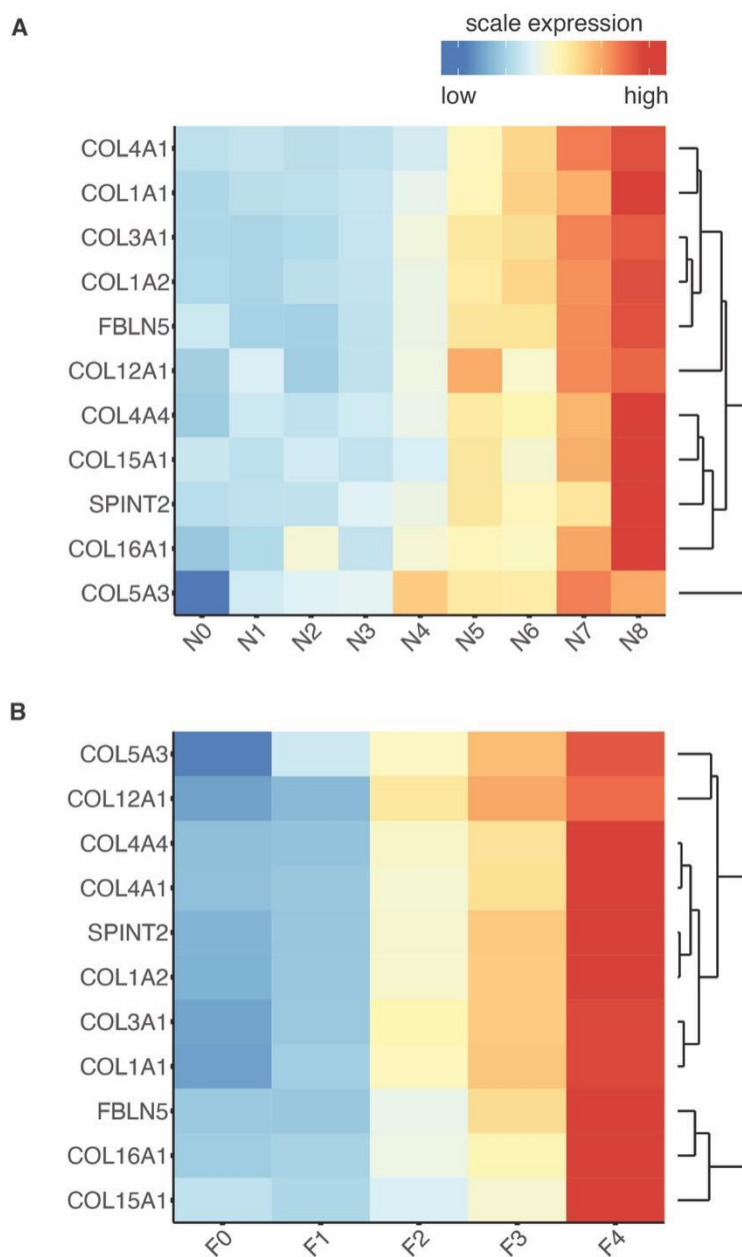

### Supplementary Figure S3 Heatmap presentation of ECM gene expression profile

A. Scale gene expression profile of multiple genes involved in the ECM process according to NAS scores. B. Scale gene expression profile of multiple genes involved in the ECM process according to fibrosis scores. Genes were clustered based on profile similarity. Genes expression level was scaled for heatmap presentation (also see the NAFLD-DB).

### Supplementary Figure S4

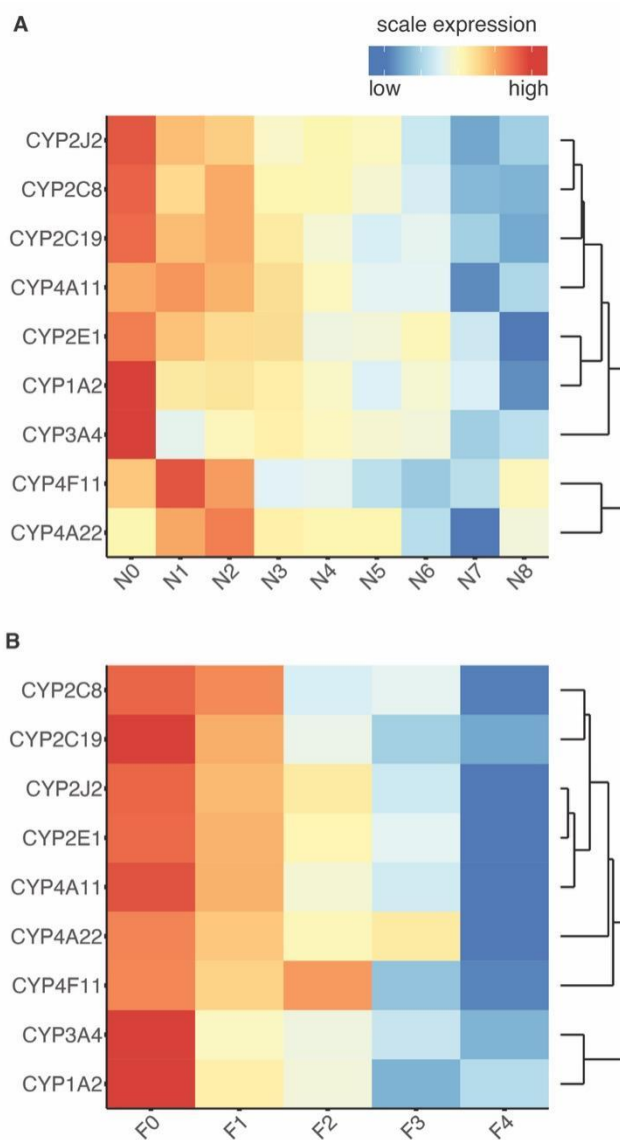

### Supplementary Figure S4 Heatmap presentation of Cytochrome P450 superfamily gene expression profile

A. Scale gene expression profile of multiple genes involved in the Cytochrome P450 superfamily according to NAS scores. B. Scale gene expression profile of multiple genes involved in the Cytochrome P450 superfamily according to fibrosis scores. Genes were clustered based on profile similarity. Genes expression level was scaled for heatmap presentation (also see the NAFLD-DB).

### Supplementary Figure S5

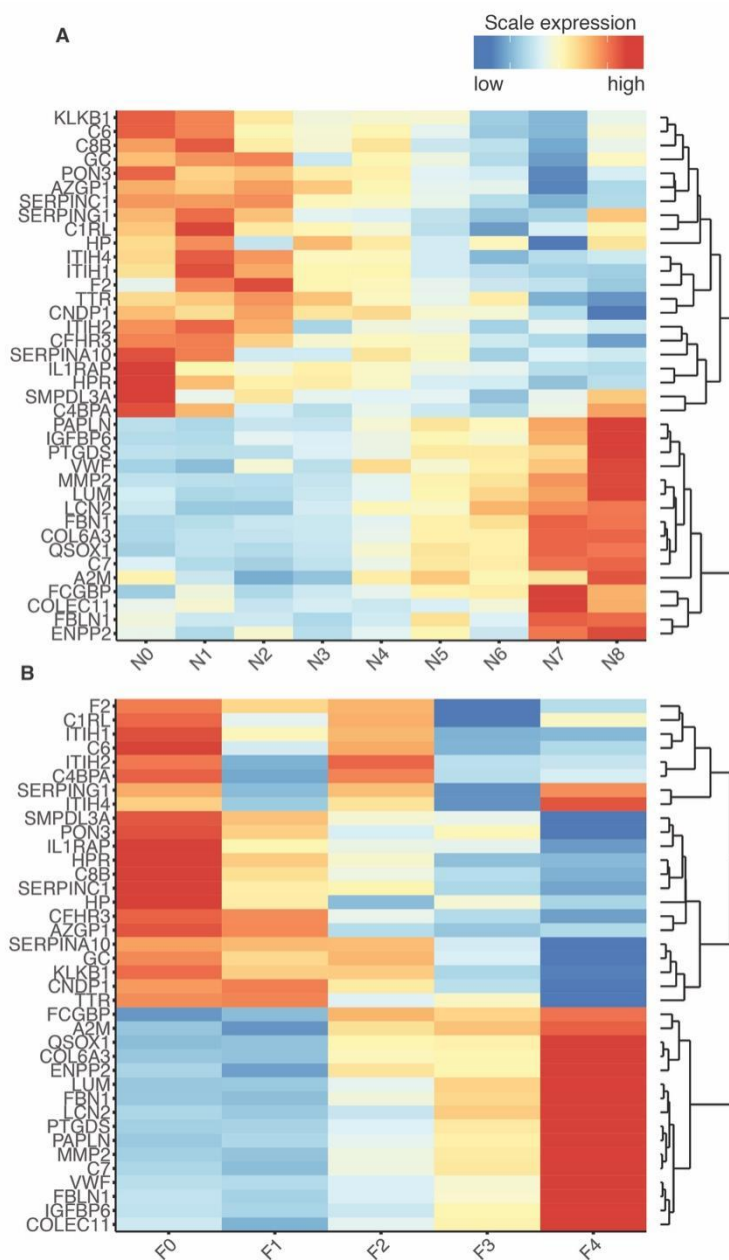

### Supplementary Figure S5 Heatmap presentation of expression profile for 32 biomarker genes

A. Scale gene expression profile of 38 biomarker genes (16 up-regulation, 22 down-regulation) according to NAS scores. B. Scale gene expression profile of 38 biomarker genes according to fibrosis scores. Genes were clustered based on profile similarity. Genes expression level was scaled for heatmap presentation (also see the NAFLD-DB). This figure is related to Figure 2E.

## **List of Supplementary Tables**

### **Supplementary Table 1**

The RNA-seq data of human liver samples.

### **Supplementary Table 2**

GO enrichment results for genes in cluster 4 (up-regulation) and cluster 14 (down regulation).

### **Supplementary Table 3**

List of secreting protein-encoding genes in cluster 4, and 14 of RNA-seq analysis.

Representing PMID supporting that the candidate gene as potential biomarker for NAFLD was listed. Note: this is a noncomprehensive list.

### **Supplementary Table 4**

Performance Characteristics of QSOX1, IL1RAP, and the QSOX1/IL1RAP ratio in proteomics data and the results of ELISA.

### **Supplementary Table 5**

Metadata for NAFLD patients and control participants involved in the ELISA validation study.
